# Supplementary material for: Modeling the partitioning of organic chemical species in cloud phases with CLEPS (1.1)
Source: Copernicus journal article supplement (doi:10.5194/acp-18-2225-2018), 2018-02-15
Supplement: Supplementary file 1 [file acp-18-2225-2018-supplement.zip]

For C4 oxidation, considered chemical pathways represent at least 75% of the estimated reactivity.

| Reactions                                                                                                                                                                                                                                                                                                                                                                                                                                                                                                                                                                                                                                                                                                                                                                                                                                                                                                                                                                                                                                                                                                                                                                           |      | $k_{298}$<br>( $M^{-n+1} s^{-1}$ )                                                                                                                            | Ea/R<br>(K)  | References          | Notes                                                                                                                   |
|-------------------------------------------------------------------------------------------------------------------------------------------------------------------------------------------------------------------------------------------------------------------------------------------------------------------------------------------------------------------------------------------------------------------------------------------------------------------------------------------------------------------------------------------------------------------------------------------------------------------------------------------------------------------------------------------------------------------------------------------------------------------------------------------------------------------------------------------------------------------------------------------------------------------------------------------------------------------------------------------------------------------------------------------------------------------------------------------------------------------------------------------------------------------------------------|------|---------------------------------------------------------------------------------------------------------------------------------------------------------------|--------------|---------------------|-------------------------------------------------------------------------------------------------------------------------|
| <b>Oxidation of Succinic Acid</b>                                                                                                                                                                                                                                                                                                                                                                                                                                                                                                                                                                                                                                                                                                                                                                                                                                                                                                                                                                                                                                                                                                                                                   |      |                                                                                                                                                               |              |                     |                                                                                                                         |
| Pathway 1: $CO(OH)CH_2CH_2CO(OH) + HO^\bullet \rightarrow CO(OH)CH_2C^\bullet HCO(OH) + H_2O$<br>$CO(OH)CH_2C^\bullet HCO(OH) + O_2 \rightarrow CO(OH)CH_2CH(OO^\bullet)CO(OH)$<br>$CO(OH)CH_2CH_2CO(OH) + HO^\bullet \rightarrow CO(OH)CH_2CH(OO^\bullet)CO(OH) + H_2O - O_2$                                                                                                                                                                                                                                                                                                                                                                                                                                                                                                                                                                                                                                                                                                                                                                                                                                                                                                      | R(1) | 1.1 10 <sup>8</sup><br>2.0 10 <sup>9</sup><br>1.1 10 <sup>8</sup>                                                                                             |              | Ervens et al., 2003 | BR: 100% - 1<br>2                                                                                                       |
| Pathway 1: $CO(OH)CH_2CH_2CO(OH) + NO_3^\bullet \rightarrow CO(OH)CH_2C^\bullet HCO(OH) + NO_3^- + H^+$<br>$CO(OH)CH_2C^\bullet HCO(OH) + O_2 \rightarrow CO(OH)CH_2CH(OO^\bullet)CO(OH)$<br>$CO(OH)CH_2CH_2CO(OH) + NO_3^\bullet \rightarrow CO(OH)CH_2CH(OO^\bullet)CO(OH) + NO_3^- + H^+ - O_2$                                                                                                                                                                                                                                                                                                                                                                                                                                                                                                                                                                                                                                                                                                                                                                                                                                                                                  | R(2) | 5.1 10 <sup>4</sup><br>2.0 10 <sup>9</sup><br>5.1 10 <sup>4</sup>                                                                                             |              |                     | BR: 100%<br>2<br>= k(CO(OH)CH <sub>2</sub> CO(OH)+ NO <sub>3</sub> <sup>•</sup> ) -3                                    |
| Pathway 1: $CO(OH)CH_2CH_2CO(O^\bullet) + HO^\bullet \rightarrow CO(OH)CH_2CH_2CO(O^\bullet) + OH^\bullet$<br>$CO(OH)CH_2CH_2CO(O^\bullet) \rightarrow CO(OH)CH_2C^\bullet H_2 + CO_2$<br>$CO(OH)CH_2C^\bullet H_2 + O_2 \rightarrow CH_2(OO^\bullet)CH_2CO(OH)$<br>Pathway 2: $CO(OH)CH_2CH_2CO(O^\bullet) + HO^\bullet \rightarrow CO(OH)CH_2C^\bullet HCO(O^\bullet) + H_2O$<br>$CO(OH)CH_2C^\bullet HCO(O^\bullet) + O_2 \rightarrow CO(OH)CH_2CH(OO^\bullet)CO(O^\bullet)$<br>$CO(OH)CH_2CH_2CO(O^\bullet) + HO^\bullet \rightarrow 0.68 CH_2(OO^\bullet)CH_2CO(OH) + 0.32 CO(OH)CH_2CH(OO^\bullet)CO(O^\bullet) + 0.68 CO_2 + 0.68 OH^-$<br>+ 0.32 H <sub>2</sub> O - O <sub>2</sub>                                                                                                                                                                                                                                                                                                                                                                                                                                                                                          | R(3) | 2.0 10 <sup>9</sup><br>1.6 10 <sup>8</sup><br>2.0 10 <sup>9</sup><br>5.0 10 <sup>8</sup>                                                                      |              | Ervens et al., 2003 | BR: 68% - 4<br>5 - 6<br>2<br>BR: 32% - 4<br>2                                                                           |
| Pathway 1: $CO(OH)CH_2CH_2CO(O^\bullet) + NO_3^\bullet \rightarrow CO(OH)CH_2C^\bullet HCO(O^\bullet) + NO_3^- + H^+$<br>$CO(OH)CH_2C^\bullet HCO(O^\bullet) + O_2 \rightarrow CO(OH)CH_2CH(OO^\bullet)CO(O^\bullet)$<br>$CO(OH)CH_2CH_2CO(O^\bullet) + NO_3^\bullet \rightarrow CO(OH)CH_2CH(OO^\bullet)CO(O^\bullet) + NO_3^- + H^+ - O_2$                                                                                                                                                                                                                                                                                                                                                                                                                                                                                                                                                                                                                                                                                                                                                                                                                                        | R(4) | 5.6 10 <sup>6</sup><br>2.0 10 <sup>9</sup><br>5.6 10 <sup>6</sup>                                                                                             | 3369<br>3369 |                     | BR: 100%<br>2<br>= k(CO(OH)CH <sub>2</sub> CO(O <sup>•</sup> )+ NO <sub>3</sub> <sup>•</sup> ) - 3                      |
| Pathway 1: $CO(O^\bullet)CH_2CH_2CO(O^\bullet) + HO^\bullet \rightarrow CO(O^\bullet)CH_2CH_2CO(O^\bullet) + OH^\bullet$<br>$CO(O^\bullet)CH_2CH_2CO(O^\bullet) \rightarrow CO(O^\bullet)CH_2C^\bullet H_2 + CO_2$<br>$CO(O^\bullet)CH_2C^\bullet H_2 + O_2 \rightarrow CH_2(OO^\bullet)CH_2CO(O^\bullet)$<br>Pathway 2: $CO(O^\bullet)CH_2CH_2CO(O^\bullet) + HO^\bullet \rightarrow CO(O^\bullet)CH_2C^\bullet HCO(O^\bullet) + H_2O$<br>$CO(O^\bullet)CH_2C^\bullet HCO(O^\bullet) + O_2 \rightarrow CO(O^\bullet)CH_2CH(OO^\bullet)CO(O^\bullet)$<br>$CO(O^\bullet)CH_2CH_2CO(O^\bullet) + HO^\bullet \rightarrow 0.55 CH_2(OO^\bullet)CH_2CO(O^\bullet) + 0.45 CO(O^\bullet)CH_2CH(OO^\bullet)CO(O^\bullet) + 0.55 CO_2 + 0.55 OH^-$<br>+ 0.45 H <sub>2</sub> O - O <sub>2</sub>                                                                                                                                                                                                                                                                                                                                                                                               | R(5) | 2.0 10 <sup>9</sup><br>4.6 10 <sup>8</sup><br>2.0 10 <sup>9</sup><br>1.0 10 <sup>9</sup>                                                                      |              |                     | BR: 55% - 7<br>5 - 6<br>2<br>BR: 45% - 7<br>2<br>8                                                                      |
| Pathway 1: $CO(O^\bullet)CH_2CH_2CO(O^\bullet) + NO_3^\bullet \rightarrow CO(O^\bullet)CH_2C^\bullet HCO(O^\bullet) + NO_3^- + H^+$<br>$CO(O^\bullet)CH_2C^\bullet HCO(O^\bullet) + O_2 \rightarrow CO(O^\bullet)CH_2CH(OO^\bullet)CO(O^\bullet)$<br>$CO(O^\bullet)CH_2CH_2CO(O^\bullet) + NO_3^\bullet \rightarrow CO(O^\bullet)CH_2CH(OO^\bullet)CO(O^\bullet) + NO_3^- + H^+ - O_2$                                                                                                                                                                                                                                                                                                                                                                                                                                                                                                                                                                                                                                                                                                                                                                                              | R(6) | 2.3 10 <sup>7</sup><br>2.0 10 <sup>9</sup><br>2.3 10 <sup>7</sup>                                                                                             | 3008<br>3008 |                     | BR: 100%<br>2<br>=k(CO(O <sup>•</sup> )CH <sub>2</sub> CO(O <sup>•</sup> )+ NO <sub>3</sub> <sup>•</sup> ) - 3          |
| Pathway 1: 2 CO(OH)CH <sub>2</sub> CH(OO <sup>•</sup> )CO(OH) → 2 CO(OH)CH <sub>2</sub> COCO(OH) + H <sub>2</sub> O <sub>2</sub><br>Pathway 2: 2 CO(OH)CH <sub>2</sub> CH(OO <sup>•</sup> )CO(OH) (+ 2 H <sub>2</sub> O) → 2 CO(OH)CH <sub>2</sub> CHO + 2 CO <sub>2</sub> + H <sub>2</sub> O <sub>2</sub> + 2 H <sub>2</sub> O<br>Pathway 3: 2 CO(OH)CH <sub>2</sub> CH(OO <sup>•</sup> )CO(OH) → CO(OH)CH <sub>2</sub> COCO(OH) + CO(OH)CH <sub>2</sub> CH(OH)CO(OH) + O <sub>2</sub><br>Pathway 4: 2 CO(OH)CH <sub>2</sub> CH(OO <sup>•</sup> )CO(OH) → 2 CO(OH)CH <sub>2</sub> CH(O <sup>•</sup> )CO(OH) + O <sub>2</sub><br>CO(OH)CH <sub>2</sub> CH(O <sup>•</sup> )CO(OH) → CO(OH)CH <sub>2</sub> C <sup>•</sup> (OH)CO(OH)<br>CO(OH)CH <sub>2</sub> C <sup>•</sup> (OH)CO(OH) + O <sub>2</sub> → CO(OH)CH <sub>2</sub> C(OH)(OO <sup>•</sup> )CO(OH)<br>2 CO(OH)CH <sub>2</sub> CH(OO <sup>•</sup> )CO(OH) → 0.90 CO(OH)CH <sub>2</sub> COCO(OH) + 0.30 CO(OH)CH <sub>2</sub> CH(OH)CO(OH) + 0.20<br>CO(OH)CH <sub>2</sub> C(OH)(OO <sup>•</sup> )CO(OH) + 0.60 CO(OH)CH <sub>2</sub> CHO + 0.60 CO <sub>2</sub> + 0.60 H <sub>2</sub> O <sub>2</sub> + 0.20 O <sub>2</sub> | R(7) | 2.2 10 <sup>7</sup><br>2.2 10 <sup>7</sup><br>2.2 10 <sup>7</sup><br>2.2 10 <sup>7</sup><br>9.0 10 <sup>6</sup><br>2.0 10 <sup>9</sup><br>7.5 10 <sup>7</sup> |              |                     | BR: 30%<br>BR: 30%<br>BR: 30%<br>BR: 10%<br>9<br>2<br>= k(2 CH <sub>2</sub> (OO <sup>•</sup> )CO(O <sup>•</sup> )) - 10 |
| Pathway 1: 2 CO(OH)CH <sub>2</sub> CH(OO <sup>•</sup> )CO(O <sup>•</sup> ) → 2 CO(OH)CH <sub>2</sub> COCO(O <sup>•</sup> ) + H <sub>2</sub> O <sub>2</sub><br>Pathway 2: 2 CO(OH)CH <sub>2</sub> CH(OO <sup>•</sup> )CO(O <sup>•</sup> ) (+ 2 H <sub>2</sub> O) → 2 CO(OH)CH <sub>2</sub> CHO + 2 CO <sub>2</sub> + H <sub>2</sub> O <sub>2</sub> + 2 OH <sup>-</sup><br>Pathway 3: 2 CO(OH)CH <sub>2</sub> CH(OO <sup>•</sup> )CO(O <sup>•</sup> ) → CO(OH)CH <sub>2</sub> COCO(O <sup>•</sup> ) + CO(OH)CH <sub>2</sub> CH(OH)CO(O <sup>•</sup> ) + O <sub>2</sub><br>Pathway 4: 2 CO(OH)CH <sub>2</sub> CH(OO <sup>•</sup> )CO(O <sup>•</sup> ) → 2 CO(OH)CH <sub>2</sub> CH(O <sup>•</sup> )CO(O <sup>•</sup> ) + O <sub>2</sub><br>CO(OH)CH <sub>2</sub> CH(O <sup>•</sup> )CO(O <sup>•</sup> ) → CO(OH)CH <sub>2</sub> C <sup>•</sup> (OH)CO(O <sup>•</sup> )<br>CO(OH)CH <sub>2</sub> C <sup>•</sup> (OH)CO(O <sup>•</sup> ) + O <sub>2</sub> → CO(OH)CH <sub>2</sub> C(OH)(OO <sup>•</sup> )CO(O <sup>•</sup> )                                                                                                                                                             |      | 2.2 10 <sup>7</sup><br>2.2 10 <sup>7</sup><br>2.2 10 <sup>7</sup><br>9.0 10 <sup>6</sup><br>2.0 10 <sup>9</sup>                                               |              |                     | BR: 30%<br>BR: 30%<br>BR: 30%<br>BR: 10%<br>9<br>2                                                                      |

| Reactions                                                                                                                                                                                                                                                                                                                                                                                                                                                                                                                                                                                                                                                                                                                                                                                                                                                                                                                                                                                                                                                                                                                                                                                                                                                                                                                                                                                                                                                                                                                                                                                                                                                                                                                                                                                                                                                                                 |       | $k_{298}$<br>( $M^{-n+1} s^{-1}$ ) | Ea/R<br>(K) | References | Notes                                           |
|-------------------------------------------------------------------------------------------------------------------------------------------------------------------------------------------------------------------------------------------------------------------------------------------------------------------------------------------------------------------------------------------------------------------------------------------------------------------------------------------------------------------------------------------------------------------------------------------------------------------------------------------------------------------------------------------------------------------------------------------------------------------------------------------------------------------------------------------------------------------------------------------------------------------------------------------------------------------------------------------------------------------------------------------------------------------------------------------------------------------------------------------------------------------------------------------------------------------------------------------------------------------------------------------------------------------------------------------------------------------------------------------------------------------------------------------------------------------------------------------------------------------------------------------------------------------------------------------------------------------------------------------------------------------------------------------------------------------------------------------------------------------------------------------------------------------------------------------------------------------------------------------|-------|------------------------------------|-------------|------------|-------------------------------------------------|
| $2 CO(OH)CH_2CH(OO^{\bullet})CO(O^-) \rightarrow 0.90 CO(OH)CH_2COCO(O^-) + 0.30 CO(OH)CH_2CH(OH)CO(O^-) + 0.20$<br>$CO(OH)CH_2C(OH)(OO^{\bullet})CO(O^-) + 0.60 CO(OH)CH_2CHO + 0.60 CO_2 + 0.60 H_2O_2 + 0.60 OH^- - 0.6 H_2O + 0.20 O_2$<br>Pathway 1: $2 CO(O^-)CH_2CH(OO^{\bullet})CO(OH) \rightarrow 2 CO(O^-)CH_2COCO(OH) + H_2O_2$<br>Pathway 2: $2 CO(O^-)CH_2CH(OO^{\bullet})CO(OH) (+ 2 H_2O) \rightarrow 2 CO(O^-)CH_2CHO + 2 CO_2 + H_2O_2 + 2 H_2O$<br>Pathway 3: $2 CO(O^-)CH_2CH(OO^{\bullet})CO(OH) \rightarrow CO(O^-)CH_2COCO(OH) + CO(O^-)CH_2CH(OH)CO(OH) + O_2$<br>Pathway 4: $2 CO(O^-)CH_2CH(OO^{\bullet})CO(OH) \rightarrow 2 CO(O^-)CH_2CH(O^{\bullet})CO(OH) + O_2$<br>$CO(O^-)CH_2CH(O^{\bullet})CO(OH) \rightarrow CO(O^-)CH_2C^{\bullet}(OH)CO(OH)$<br>$CO(O^-)CH_2C^{\bullet}(OH)CO(OH) + O_2 \rightarrow CO(O^-)CH_2C(OH)(OO^{\bullet})CO(OH)$                                                                                                                                                                                                                                                                                                                                                                                                                                                                                                                                                                                                                                                                                                                                                                                                                                                                                                                                                                                                            | R(8)  | $7.5 \cdot 10^7$                   |             |            | $= k(2 CH_2(OO^{\bullet})CO(O^-)) - 10$         |
| $2 CO(O^-)CH_2CH(OO^{\bullet})CO(OH) \rightarrow 0.90 CO(O^-)CH_2COCO(OH) + 0.30 CO(O^-)CH_2CH(OH)CO(OH) +$<br>$0.20 CO(O^-)CH_2C(OH)(OO^{\bullet})CO(OH) + 0.60 CO(O^-)CH_2CHO + 0.60 CO_2 + 0.60 H_2O_2 + 0.20 O_2$<br>Pathway 1: $2 CO(O^-)CH_2CH(OO^{\bullet})CO(O^-) \rightarrow 2 CO(O^-)CH_2COCO(O^-) + H_2O_2$<br>Pathway 2: $2 CO(O^-)CH_2CH(OO^{\bullet})CO(O^-) (+ 2 H_2O) \rightarrow 2 CO(O^-)CH_2CHO + 2 CO_2 + H_2O_2 + 2 OH^-$<br>Pathway 3: $2 CO(O^-)CH_2CH(OO^{\bullet})CO(O^-) \rightarrow CO(O^-)CH_2COCO(O^-) + CO(O^-)CH_2CH(OH)CO(O^-) + O_2$<br>Pathway 4: $2 CO(O^-)CH_2CH(OO^{\bullet})CO(O^-) \rightarrow 2 CO(O^-)CH_2CH(O^{\bullet})CO(O^-) + O_2$<br>$CO(O^-)CH_2CH(O^{\bullet})CO(O^-) \rightarrow CO(O^-)CH_2C^{\bullet}(OH)CO(O^-)$<br>$CO(O^-)CH_2C^{\bullet}(OH)CO(O^-) + O_2 \rightarrow CO(O^-)CH_2C(OH)(OO^{\bullet})CO(O^-)$                                                                                                                                                                                                                                                                                                                                                                                                                                                                                                                                                                                                                                                                                                                                                                                                                                                                                                                                                                                                                      | R(9)  | $7.5 \cdot 10^7$                   |             |            | $= k(2 CH_2(OO^{\bullet})CO(O^-)) - 10$         |
| $2 CO(O^-)CH_2CH(OO^{\bullet})CO(O^-) \rightarrow 0.90 CO(O^-)CH_2COCO(O^-) + 0.60 CO(O^-)CH_2CHO + 0.30 CO(O^-)CH_2CH(OH)CO(O^-) +$<br>$0.20 CO(O^-)CH_2C(OH)(OO^{\bullet})CO(O^-) + 0.60 CO_2 + 0.60 H_2O_2 + 0.60 OH^- - 0.60 H_2O + 0.20 O_2$<br>$CO(OH)CH_2C(OH)(OO^{\bullet})CO(OH) + OH^- \rightarrow CO(OH)CH_2C(O^-)(OO^{\bullet})CO(OH) + H_2O$<br>$CO(OH)CH_2C(O^-)(OO^{\bullet})CO(OH) \rightarrow CO(OH)CH_2COCO(OH) + O_2^{\bullet-}$<br>$CO(OH)CH_2C(OH)(OO^{\bullet})CO(OH) + OH^- \rightarrow CO(OH)CH_2COCO(OH) + O_2^{\bullet-} + H_2O$<br>$CO(OH)CH_2C(OH)(OO^{\bullet})CO(OH) \rightarrow CO(OH)CH_2COCO(OH) + HO_2^{\bullet}$<br>$CO(OH)CH_2C(OH)(OO^{\bullet})CO(O^-) + OH^- \rightarrow CO(OH)CH_2C(O^-)(OO^{\bullet})CO(O^-) + H_2O$<br>$CO(OH)CH_2C(O^-)(OO^{\bullet})CO(O^-) \rightarrow CO(OH)CH_2COCO(O^-) + O_2^{\bullet-}$<br>$CO(OH)CH_2C(OH)(OO^{\bullet})CO(O^-) + OH^- \rightarrow CO(OH)CH_2COCO(O^-) + O_2^{\bullet-} + H_2O$<br>$CO(OH)CH_2C(OH)(OO^{\bullet})CO(O^-) \rightarrow CO(OH)CH_2COCO(O^-) + HO_2^{\bullet}$<br>$CO(O^-)CH_2C(OH)(OO^{\bullet})CO(OH) + OH^- \rightarrow CO(O^-)CH_2C(O^-)(OO^{\bullet})CO(OH) + H_2O$<br>$CO(O^-)CH_2C(O^-)(OO^{\bullet})CO(OH) \rightarrow CO(O^-)CH_2COCO(OH) + O_2^{\bullet-}$<br>$CO(O^-)CH_2C(OH)(OO^{\bullet})CO(OH) + OH^- \rightarrow CO(O^-)CH_2COCO(OH) + O_2^{\bullet-} + H_2O$<br>$CO(O^-)CH_2C(OH)(OO^{\bullet})CO(OH) \rightarrow CO(O^-)CH_2COCO(OH) + HO_2^{\bullet}$<br>$CO(O^-)CH_2C(OH)(OO^{\bullet})CO(O^-) + OH^- \rightarrow CO(O^-)CH_2C(O^-)(OO^{\bullet})CO(O^-) + H_2O$<br>$CO(O^-)CH_2C(O^-)(OO^{\bullet})CO(O^-) \rightarrow CO(O^-)CH_2COCO(O^-) + O_2^{\bullet-}$<br>$CO(O^-)CH_2C(OH)(OO^{\bullet})CO(O^-) + OH^- \rightarrow CO(O^-)CH_2COCO(O^-) + O_2^{\bullet-} + H_2O$<br>$CO(O^-)CH_2C(OH)(OO^{\bullet})CO(O^-) \rightarrow CO(O^-)CH_2COCO(O^-) + HO_2^{\bullet}$ | R(10) | $7.5 \cdot 10^7$                   |             |            | $= k(2 CH_2(OO^{\bullet})CO(O^-)) - 10$         |
|                                                                                                                                                                                                                                                                                                                                                                                                                                                                                                                                                                                                                                                                                                                                                                                                                                                                                                                                                                                                                                                                                                                                                                                                                                                                                                                                                                                                                                                                                                                                                                                                                                                                                                                                                                                                                                                                                           |       | $4.9 \cdot 10^9$                   |             |            | 11                                              |
|                                                                                                                                                                                                                                                                                                                                                                                                                                                                                                                                                                                                                                                                                                                                                                                                                                                                                                                                                                                                                                                                                                                                                                                                                                                                                                                                                                                                                                                                                                                                                                                                                                                                                                                                                                                                                                                                                           | R(11) | $4.9 \cdot 10^9$                   |             |            | $= k(CH_3CH(OH)(OO^{\bullet}) + OH^-)$          |
|                                                                                                                                                                                                                                                                                                                                                                                                                                                                                                                                                                                                                                                                                                                                                                                                                                                                                                                                                                                                                                                                                                                                                                                                                                                                                                                                                                                                                                                                                                                                                                                                                                                                                                                                                                                                                                                                                           | R(12) | $1.9 \cdot 10^2$                   |             |            | 12                                              |
|                                                                                                                                                                                                                                                                                                                                                                                                                                                                                                                                                                                                                                                                                                                                                                                                                                                                                                                                                                                                                                                                                                                                                                                                                                                                                                                                                                                                                                                                                                                                                                                                                                                                                                                                                                                                                                                                                           |       | $4.9 \cdot 10^9$                   |             |            | 11                                              |
|                                                                                                                                                                                                                                                                                                                                                                                                                                                                                                                                                                                                                                                                                                                                                                                                                                                                                                                                                                                                                                                                                                                                                                                                                                                                                                                                                                                                                                                                                                                                                                                                                                                                                                                                                                                                                                                                                           | R(13) | $4.9 \cdot 10^9$                   |             |            | $= k(CH_3CH(OH)(OO^{\bullet}) + OH^-)$          |
|                                                                                                                                                                                                                                                                                                                                                                                                                                                                                                                                                                                                                                                                                                                                                                                                                                                                                                                                                                                                                                                                                                                                                                                                                                                                                                                                                                                                                                                                                                                                                                                                                                                                                                                                                                                                                                                                                           | R(14) | $1.9 \cdot 10^2$                   |             |            | 12                                              |
|                                                                                                                                                                                                                                                                                                                                                                                                                                                                                                                                                                                                                                                                                                                                                                                                                                                                                                                                                                                                                                                                                                                                                                                                                                                                                                                                                                                                                                                                                                                                                                                                                                                                                                                                                                                                                                                                                           |       | $4.9 \cdot 10^9$                   |             |            | 11                                              |
|                                                                                                                                                                                                                                                                                                                                                                                                                                                                                                                                                                                                                                                                                                                                                                                                                                                                                                                                                                                                                                                                                                                                                                                                                                                                                                                                                                                                                                                                                                                                                                                                                                                                                                                                                                                                                                                                                           | R(15) | $4.9 \cdot 10^9$                   |             |            | $= k(CH_3CH(OH)(OO^{\bullet}) + OH^-)$          |
|                                                                                                                                                                                                                                                                                                                                                                                                                                                                                                                                                                                                                                                                                                                                                                                                                                                                                                                                                                                                                                                                                                                                                                                                                                                                                                                                                                                                                                                                                                                                                                                                                                                                                                                                                                                                                                                                                           | R(16) | $1.9 \cdot 10^2$                   |             |            | 12                                              |
|                                                                                                                                                                                                                                                                                                                                                                                                                                                                                                                                                                                                                                                                                                                                                                                                                                                                                                                                                                                                                                                                                                                                                                                                                                                                                                                                                                                                                                                                                                                                                                                                                                                                                                                                                                                                                                                                                           |       | $4.9 \cdot 10^9$                   |             |            | 11                                              |
|                                                                                                                                                                                                                                                                                                                                                                                                                                                                                                                                                                                                                                                                                                                                                                                                                                                                                                                                                                                                                                                                                                                                                                                                                                                                                                                                                                                                                                                                                                                                                                                                                                                                                                                                                                                                                                                                                           | R(17) | $4.9 \cdot 10^9$                   |             |            | $= k(CH_3CH(OH)(OO^{\bullet}) + OH^-)$          |
|                                                                                                                                                                                                                                                                                                                                                                                                                                                                                                                                                                                                                                                                                                                                                                                                                                                                                                                                                                                                                                                                                                                                                                                                                                                                                                                                                                                                                                                                                                                                                                                                                                                                                                                                                                                                                                                                                           | R(18) | $1.9 \cdot 10^2$                   |             |            | 12                                              |
| <b>Oxidation of Oxaloacetic Acid</b>                                                                                                                                                                                                                                                                                                                                                                                                                                                                                                                                                                                                                                                                                                                                                                                                                                                                                                                                                                                                                                                                                                                                                                                                                                                                                                                                                                                                                                                                                                                                                                                                                                                                                                                                                                                                                                                      |       |                                    |             |            | <b>13</b>                                       |
| Pathway 1: $CO(OH)CH_2C(OH)(OH)CO(OH) + HO^{\bullet} \rightarrow CO(OH)CH_2C(OH)(O^{\bullet})CO(OH) + H_2O$<br>$CO(OH)CH_2C(OH)(O^{\bullet})CO(OH) \rightarrow CO(OH)CH_2CO(OH) + C^{\bullet}O(OH)$<br>$C^{\bullet}O(OH) + O_2 \rightarrow CO(OH)(OO^{\bullet})$<br>$CO(OH)CH_2C(OH)(OH)CO(OH) + HO^{\bullet} \rightarrow CO(OH)CH_2CO(OH) + CO(OH)(OO^{\bullet}) + H_2O - O_2$<br>Pathway 1: $CO(OH)CH_2C(OH)(OH)CO(OH) + NO_3^{\bullet} \rightarrow CO(OH)C^{\bullet}HC(OH)(OH)CO(OH) + NO_3^- + H^+$<br>$CO(OH)C^{\bullet}HC(OH)(OH)CO(OH) + O_2 \rightarrow CO(OH)CH(OO^{\bullet})C(OH)(OH)CO(OH)$<br>$CO(OH)CH_2C(OH)(OH)CO(OH) + NO_3^{\bullet} \rightarrow CO(OH)CH(OO^{\bullet})C(OH)(OH)CO(OH) + NO_3^- + H^+ - O_2$<br>Pathway 1: $CO(OH)CH_2COCO(O^-) + HO^{\bullet} \rightarrow CO(OH)CH_2COCO(O^{\bullet}) + OH^-$                                                                                                                                                                                                                                                                                                                                                                                                                                                                                                                                                                                                                                                                                                                                                                                                                                                                                                                                                                                                                                                           | R(19) | $2.6 \cdot 10^8$                   |             |            | BR: 100% - 14<br>5 - 6<br>2<br>8                |
|                                                                                                                                                                                                                                                                                                                                                                                                                                                                                                                                                                                                                                                                                                                                                                                                                                                                                                                                                                                                                                                                                                                                                                                                                                                                                                                                                                                                                                                                                                                                                                                                                                                                                                                                                                                                                                                                                           |       | $2.0 \cdot 10^9$                   |             |            | BR: 100%                                        |
|                                                                                                                                                                                                                                                                                                                                                                                                                                                                                                                                                                                                                                                                                                                                                                                                                                                                                                                                                                                                                                                                                                                                                                                                                                                                                                                                                                                                                                                                                                                                                                                                                                                                                                                                                                                                                                                                                           |       | $5.1 \cdot 10^4$                   |             |            | 2                                               |
|                                                                                                                                                                                                                                                                                                                                                                                                                                                                                                                                                                                                                                                                                                                                                                                                                                                                                                                                                                                                                                                                                                                                                                                                                                                                                                                                                                                                                                                                                                                                                                                                                                                                                                                                                                                                                                                                                           |       | $2.0 \cdot 10^9$                   |             |            |                                                 |
|                                                                                                                                                                                                                                                                                                                                                                                                                                                                                                                                                                                                                                                                                                                                                                                                                                                                                                                                                                                                                                                                                                                                                                                                                                                                                                                                                                                                                                                                                                                                                                                                                                                                                                                                                                                                                                                                                           | R(20) | $5.1 \cdot 10^4$                   |             |            | $= k(CO(OH)CH_2CO(OH) + NO_3^{\bullet}) -$<br>3 |
|                                                                                                                                                                                                                                                                                                                                                                                                                                                                                                                                                                                                                                                                                                                                                                                                                                                                                                                                                                                                                                                                                                                                                                                                                                                                                                                                                                                                                                                                                                                                                                                                                                                                                                                                                                                                                                                                                           |       | $6.3 \cdot 10^7$                   |             |            | BR: 100% - 15                                   |

| Reactions                                                                                                                                                                                                                            |       | $k_{298}$<br>( $M^{-n+1} s^{-1}$ ) | Ea/R<br>(K) | References | Notes                                                          |
|--------------------------------------------------------------------------------------------------------------------------------------------------------------------------------------------------------------------------------------|-------|------------------------------------|-------------|------------|----------------------------------------------------------------|
| $CO(OH)CH_2COCO(O^{\bullet}) \rightarrow CO(OH)CH_2C^{\bullet}O + CO_2$                                                                                                                                                              |       | $2.0 \cdot 10^9$                   |             |            | 5 - 6                                                          |
| $CO(OH)CH_2C^{\bullet}O + O_2 \rightarrow CO(OH)CH_2CO(OO^{\bullet})$                                                                                                                                                                |       | $2.0 \cdot 10^9$                   |             |            | 2                                                              |
| $CO(OH)CH_2COCO(O^{\bullet}) + HO^{\bullet} \rightarrow CO(OH)CH_2CO(OO^{\bullet}) + CO_2 + OH^{-} - O_2$                                                                                                                            | R(21) | $6.3 \cdot 10^7$                   |             |            | 8                                                              |
| Pathway 1: $CO(OH)CH_2COCO(O^{\bullet}) + NO_3^{\bullet} \rightarrow CO(OH)C^{\bullet}HCOCO(O^{\bullet}) + NO_3^{-} + H^{+}$                                                                                                         |       | $5.610^6$                          | 3369        |            | BR: 100%                                                       |
| $CO(OH)C^{\bullet}HCOCO(O^{\bullet}) + O_2 \rightarrow CO(OH)CH(OO^{\bullet})COCO(O^{\bullet})$                                                                                                                                      |       | $2.0 \cdot 10^9$                   |             |            | 2                                                              |
| $CO(OH)CH_2COCO(O^{\bullet}) + NO_3^{\bullet} \rightarrow CO(OH)CH(OO^{\bullet})COCO(O^{\bullet}) + NO_3^{-} + H^{+} - O_2$                                                                                                          | R(22) | $5.610^6$                          | 3369        |            | = $k(CO(OH)CH_2CO(O^{\bullet}) + NO_3^{\bullet}) - 3$          |
| Pathway 1: $CO(O^{\bullet})CH_2COCO(OH) + HO^{\bullet} \rightarrow CO(O^{\bullet})CH_2COCO(OH) + OH^{-}$                                                                                                                             |       | $2.5 \cdot 10^8$                   |             |            | BR: 100% - 16                                                  |
| $CO(O^{\bullet})CH_2COCO(OH) \rightarrow C^{\bullet}H_2COCO(OH) + CO_2$                                                                                                                                                              |       |                                    |             |            | 5 - 6                                                          |
| $C^{\bullet}H_2COCO(OH) + O_2 \rightarrow CO(OH)COCH_2(OO^{\bullet})$                                                                                                                                                                |       | $2.0 \cdot 10^9$                   |             |            | 2                                                              |
| $CO(O^{\bullet})CH_2COCO(OH) + HO^{\bullet} \rightarrow CO(OH)COCH_2(OO^{\bullet}) + CO_2 + OH^{-} - O_2$                                                                                                                            | R(23) | $2.5 \cdot 10^8$                   |             |            | 8                                                              |
| Pathway 1: $CO(O^{\bullet})CH_2COCO(OH) + NO_3^{\bullet} \rightarrow CO(O^{\bullet})C^{\bullet}HCOCO(OH) + NO_3^{-} + H^{+}$                                                                                                         |       | $5.6 \cdot 10^6$                   | 3369        |            | BR: 100%                                                       |
| $CO(O^{\bullet})C^{\bullet}HCOCO(OH) + O_2 \rightarrow CO(O^{\bullet})CH(OO^{\bullet})COCO(OH)$                                                                                                                                      |       | $2.0 \cdot 10^9$                   |             |            | 2                                                              |
| $CO(O^{\bullet})CH_2COCO(OH) + NO_3^{\bullet} \rightarrow CO(O^{\bullet})CH(OO^{\bullet})COCO(OH) + NO_3^{-} + H^{+} - O_2$                                                                                                          | R(24) | $5.6 \cdot 10^6$                   | 3369        |            | = $k(CO(OH)CH_2CO(O^{\bullet}) + NO_3^{\bullet}) - 3$          |
| Pathway 1: $CO(O^{\bullet})CH_2C(OH)(OH)CO(OH) + HO^{\bullet} \rightarrow CO(O^{\bullet})CH_2C(OH)(OH)CO(OH) + OH^{-}$                                                                                                               |       | $2.7 \cdot 10^8$                   |             |            | BR: 50% - 17                                                   |
| $CO(O^{\bullet})CH_2C(OH)(OH)CO(OH) \rightarrow C^{\bullet}H_2C(OH)(OH)CO(OH) + CO_2$                                                                                                                                                |       |                                    |             |            | 5 - 6                                                          |
| $C^{\bullet}H_2C(OH)(OH)CO(OH) + O_2 \rightarrow CH_2(OO^{\bullet})C(OH)(OH)CO(OH)$                                                                                                                                                  |       | $2.0 \cdot 10^9$                   |             |            | 2                                                              |
| Pathway 2: $CO(O^{\bullet})CH_2C(OH)(OH)CO(OH) + HO^{\bullet} \rightarrow CO(O^{\bullet})CH_2C(OH)(O^{\bullet})CO(OH) + H_2O$                                                                                                        |       | $2.7 \cdot 10^8$                   |             |            | BR: 50% - 17                                                   |
| $CO(O^{\bullet})CH_2C(OH)(O^{\bullet})CO(OH) \rightarrow CO(O^{\bullet})CH_2CO(OH) + C^{\bullet}O(OH)$                                                                                                                               |       |                                    |             |            | 5 - 6                                                          |
| $C^{\bullet}O(OH) + O_2 \rightarrow CO(OH)(OO^{\bullet})$                                                                                                                                                                            |       | $2.0 \cdot 10^9$                   |             |            | 2                                                              |
| $CO(O^{\bullet})CH_2C(OH)(OH)CO(OH) + HO^{\bullet} \rightarrow 0.50 CO(OH)C(OH)(OH)CH_2(OO^{\bullet}) + 0.50 CO(OH)CH_2CO(O^{\bullet}) + 0.50 CO(OH)(OO^{\bullet}) + 0.50 CO_2 + 0.50 OH^{-} + 0.50 H_2O - O_2$                      | R(25) | $5.4 \cdot 10^8$                   |             |            | 8                                                              |
| Pathway 1: $CO(O^{\bullet})CH_2C(OH)(OH)CO(OH) + NO_3^{\bullet} \rightarrow CO(O^{\bullet})C^{\bullet}HC(OH)(OH)CO(OH) + NO_3^{-} + H^{+}$                                                                                           |       | $5.6 \cdot 10^6$                   | 3369        |            | BR: 100%                                                       |
| $CO(O^{\bullet})C^{\bullet}HC(OH)(OH)CO(OH) + O_2 \rightarrow CO(O^{\bullet})CH(OO^{\bullet})C(OH)(OH)CO(OH)$                                                                                                                        |       | $2.0 \cdot 10^9$                   |             |            | 2                                                              |
| $CO(O^{\bullet})CH_2C(OH)(OH)CO(OH) + NO_3^{\bullet} \rightarrow CO(O^{\bullet})CH(OO^{\bullet})C(OH)(OH)CO(OH) + NO_3^{-} + H^{+} - O_2$                                                                                            | R(26) | $5.6 \cdot 10^6$                   | 3369        |            | = $k(CO(OH)CH_2CO(O^{\bullet}) + NO_3^{\bullet}) - 3$          |
| Pathway 1: $CO(O^{\bullet})CH_2COCO(O^{\bullet}) + HO^{\bullet} \rightarrow CO(O^{\bullet})CH_2COCO(O^{\bullet}) + OH^{-}$                                                                                                           |       | $2.6 \cdot 10^8$                   |             |            | BR: 82% - 18                                                   |
| $CO(O^{\bullet})CH_2COCO(O^{\bullet}) \rightarrow C^{\bullet}H_2COCO(O^{\bullet}) + CO_2$                                                                                                                                            |       |                                    |             |            | 5 - 6                                                          |
| $C^{\bullet}H_2COCO(O^{\bullet}) + O_2 \rightarrow CH_2(OO^{\bullet})COCO(O^{\bullet})$                                                                                                                                              |       | $2.0 \cdot 10^9$                   |             |            | 2                                                              |
| Pathway 2: $CO(O^{\bullet})CH_2COCO(O^{\bullet}) + HO^{\bullet} \rightarrow CO(O^{\bullet})CH_2COCO(O^{\bullet}) + OH^{-}$                                                                                                           |       | $5.8 \cdot 10^7$                   |             |            | BR: 18% - 18                                                   |
| $CO(O^{\bullet})CH_2COCO(O^{\bullet}) \rightarrow CO(O^{\bullet})CH_2C^{\bullet}O + CO_2$                                                                                                                                            |       |                                    |             |            | 5 - 6                                                          |
| $CO(O^{\bullet})CH_2C^{\bullet}O + O_2 \rightarrow CO(O^{\bullet})CH_2CO(OO^{\bullet})$                                                                                                                                              |       | $2.0 \cdot 10^9$                   |             |            | 2                                                              |
| $CO(O^{\bullet})CH_2COCO(O^{\bullet}) + HO^{\bullet} \rightarrow 0.82 CH_2(OO^{\bullet})COCO(O^{\bullet}) + 0.18 CO(O^{\bullet})CH_2CO(OO^{\bullet}) + CO_2 + OH^{-} - O_2$                                                          | R(27) | $3.2 \cdot 10^8$                   |             |            | 8                                                              |
| Pathway 1: $CO(O^{\bullet})CH_2COCO(O^{\bullet}) + NO_3^{\bullet} \rightarrow CO(O^{\bullet})C^{\bullet}HCOCO(O^{\bullet}) + NO_3^{-} + H^{+}$                                                                                       |       | $2.3 \cdot 10^7$                   | 3008        |            | BR: 100%                                                       |
| $CO(O^{\bullet})C^{\bullet}HCOCO(O^{\bullet}) + O_2 \rightarrow CO(O^{\bullet})CH(OO^{\bullet})COCO(O^{\bullet})$                                                                                                                    |       | $2.0 \cdot 10^9$                   |             |            | 2                                                              |
| $CO(O^{\bullet})CH_2COCO(O^{\bullet}) + NO_3^{\bullet} \rightarrow CO(O^{\bullet})CH(OO^{\bullet})COCO(O^{\bullet}) + NO_3^{-} + H^{+} - O_2$                                                                                        | R(28) | $2.3 \cdot 10^7$                   | 3008        |            | = $k(CO(O^{\bullet})CH_2CO(O^{\bullet}) + NO_3^{\bullet}) - 3$ |
| Pathway 1: $2 CO(OH)CH(OO^{\bullet})C(OH)(OH)CO(OH) \rightarrow 2 CO(OH)COC(OH)(OH)CO(OH) + H_2O_2$                                                                                                                                  |       | $2.2 \cdot 10^7$                   |             |            | BR: 30%                                                        |
| Pathway 2: $2 CO(OH)CH(OO^{\bullet})C(OH)(OH)CO(OH) (+ 2 H_2O) \rightarrow 2 CHOC(OH)(OH)CO(OH) + 2 CO_2 + H_2O_2 + 2 H_2O$                                                                                                          |       | $2.2 \cdot 10^7$                   |             |            | BR: 30%                                                        |
| Pathway 3: $2 CO(OH)CH(OO^{\bullet})C(OH)(OH)CO(OH) \rightarrow CO(OH)CH(OH)C(OH)(OH)CO(OH) + CO(OH)COC(OH)(OH)CO(OH) + O_2$                                                                                                         |       | $2.2 \cdot 10^7$                   |             |            | BR: 30%                                                        |
| Pathway 4: $2 CO(OH)CH(OO^{\bullet})C(OH)(OH)CO(OH) \rightarrow 2 CO(OH)CH(O^{\bullet})C(OH)(OH)CO(OH) + O_2$                                                                                                                        |       | $9.0 \cdot 10^6$                   |             |            | BR: 10%                                                        |
| $CO(OH)CH(O^{\bullet})C(OH)(OH)CO(OH) \rightarrow CO(OH)C^{\bullet}(OH)C(OH)(OH)CO(OH)$                                                                                                                                              |       |                                    |             |            | 9                                                              |
| $CO(OH)C^{\bullet}(OH)C(OH)(OH)CO(OH) + O_2 \rightarrow CO(OH)C(OH)(OO^{\bullet})C(OH)(OH)CO(OH)$                                                                                                                                    |       | $2.0 \cdot 10^9$                   |             |            | 2                                                              |
| $2 CO(OH)CH(OO^{\bullet})C(OH)(OH)CO(OH) \rightarrow 0.90 CO(OH)COC(OH)(OH)CO(OH) + 0.60 CO(OH)C(OH)(OH)CHO + 0.30 CO(OH)CH(OH)C(OH)(OH)CO(OH) + 0.20 CO(OH)C(OH)(OO^{\bullet})C(OH)(OH)CO(OH) + 0.60 CO_2 + 0.60 H_2O_2 + 0.20 O_2$ | R(29) | $7.5 \cdot 10^7$                   |             |            | = $k(2 CH_2(OO^{\bullet})CO(O^{\bullet})) - 10$                |
| Pathway 1: $2 CO(OH)CH(OO^{\bullet})COCO(O^{\bullet}) \rightarrow 2 CO(OH)COCOCO(O^{\bullet}) + H_2O_2$                                                                                                                              |       | $2.2 \cdot 10^7$                   |             |            | BR: 30%                                                        |
| Pathway 2: $2 CO(OH)CH(OO^{\bullet})COCO(O^{\bullet}) (+ 2 H_2O) \rightarrow 2 CHOCOCO(O^{\bullet}) + 2 CO_2 + H_2O_2 + 2 H_2O$                                                                                                      |       | $2.2 \cdot 10^7$                   |             |            | BR: 30%                                                        |
| Pathway 3: $2 CO(OH)CH(OO^{\bullet})COCO(O^{\bullet}) \rightarrow CO(OH)CH(OH)COCO(O^{\bullet}) + CO(OH)COCOCO(O^{\bullet}) + O_2$                                                                                                   |       | $2.2 \cdot 10^7$                   |             |            | BR: 30%                                                        |

| Reactions                                                                                                                                                                                                                                                                                                                                                                                                                                                                                                                                                                                                                                                                                                                                                                                                                                                                                                                                                                                                                                                                                                                                             | $k_{298}$<br>( $M^{-n+1} s^{-1}$ )                                                                             | Ea/R<br>(K) | References               | Notes                                                                                                 |
|-------------------------------------------------------------------------------------------------------------------------------------------------------------------------------------------------------------------------------------------------------------------------------------------------------------------------------------------------------------------------------------------------------------------------------------------------------------------------------------------------------------------------------------------------------------------------------------------------------------------------------------------------------------------------------------------------------------------------------------------------------------------------------------------------------------------------------------------------------------------------------------------------------------------------------------------------------------------------------------------------------------------------------------------------------------------------------------------------------------------------------------------------------|----------------------------------------------------------------------------------------------------------------|-------------|--------------------------|-------------------------------------------------------------------------------------------------------|
| Pathway 4: $2 CO(OH)CH(OO^{\bullet})COCO(O^{\bullet}) \rightarrow 2 CO(OH)CH(O^{\bullet})COCO(O^{\bullet}) + O_2$<br>$CO(OH)CH(O^{\bullet})COCO(O^{\bullet}) \rightarrow CO(OH)C^{\bullet}(OH)COCO(O^{\bullet})$<br>$CO(OH)C^{\bullet}(OH)COCO(O^{\bullet}) + O_2 \rightarrow CO(OH)C(OH)(OO^{\bullet})COCO(O^{\bullet})$<br>$2 CO(OH)CH(OO^{\bullet})COCO(O^{\bullet}) \rightarrow 0.90 CO(OH)COCOCO(O^{\bullet}) + 0.60 CO(O^{\bullet})COCHO + 0.30 CO(OH)CH(OH)COCO(O^{\bullet}) + 0.20 CO(OH)C(OH)(OO^{\bullet})COCO(O^{\bullet}) + 0.60 CO_2 + 0.60 H_2O_2 + 0.20 O_2$                                                                                                                                                                                                                                                                                                                                                                                                                                                                                                                                                                           | $9.0 \cdot 10^6$<br><br><br><br>R(30) $7.5 \cdot 10^7$                                                         |             |                          | BR: 10%<br>9<br>2<br>= $k(2 CH_2(OO^{\bullet})CO(O^{\bullet})) - 10$                                  |
| Pathway 1: $2 CO(O^{\bullet})CH(OO^{\bullet})COCO(OH) \rightarrow 2 CO(O^{\bullet})COCOCO(OH) + H_2O_2$<br>Pathway 2: $2 CO(O^{\bullet})CH(OO^{\bullet})COCO(OH) (+ 2 H_2O) \rightarrow 2 CHOCOCO(OH) + 2 CO_2 + H_2O_2 + 2 OH^{\bullet}$<br>Pathway 3: $2 CO(O^{\bullet})CH(OO^{\bullet})COCO(OH) \rightarrow CO(O^{\bullet})CH(OH)COCO(OH) + CO(O^{\bullet})COCOCO(OH) + O_2$<br>Pathway 4: $2 CO(O^{\bullet})CH(OO^{\bullet})COCO(OH) \rightarrow 2 CO(O^{\bullet})CH(O^{\bullet})COCO(OH) + O_2$<br>$CO(O^{\bullet})CH(O^{\bullet})COCO(OH) \rightarrow CO(O^{\bullet})C^{\bullet}(OH)COCO(OH)$<br>$CO(O^{\bullet})C^{\bullet}(OH)COCO(OH) + O_2 \rightarrow CO(O^{\bullet})C(OH)(OO^{\bullet})COCO(OH)$<br>$2 CO(O^{\bullet})CH(OO^{\bullet})COCO(OH) \rightarrow 0.90 CO(OH)COCOCO(O^{\bullet}) + 0.60 CO(OH)COCHO + 0.30 CO(O^{\bullet})CH(OH)COCO(OH) + 0.20 CO(O^{\bullet})C(OH)(OO^{\bullet})COCO(OH) + 0.60 CO_2 + 0.60 H_2O_2 + 0.60 OH^{\bullet} - 0.60 H_2O + 0.20 O_2$                                                                                                                                                                 | $2.2 \cdot 10^7$<br>$2.2 \cdot 10^7$<br>$2.2 \cdot 10^7$<br>$9.0 \cdot 10^6$<br><br><br>R(31) $7.5 \cdot 10^7$ |             |                          | BR: 30%<br>BR: 30%<br>BR: 30%<br>BR: 10%<br>9<br>2<br>= $k(2 CH_2(OO^{\bullet})CO(O^{\bullet})) - 10$ |
| Pathway 1: $2 CO(O^{\bullet})CH(OO^{\bullet})C(OH)(OH)CO(OH) \rightarrow 2 CO(O^{\bullet})COC(OH)(OH)CO(OH) + H_2O_2$<br>Pathway 2: $2 CO(O^{\bullet})CH(OO^{\bullet})C(OH)(OH)CO(OH) (+ 2 H_2O) \rightarrow 2 CHOC(OH)(OH)CO(OH) + 2 CO_2 + H_2O_2 + 2 OH^{\bullet}$<br>Pathway 3: $2 CO(O^{\bullet})CH(OO^{\bullet})C(OH)(OH)CO(OH) \rightarrow CO(O^{\bullet})CH(OH)C(OH)(OH)CO(OH) + CO(O^{\bullet})COC(OH)(OH)CO(OH) + O_2$<br>Pathway 4: $2 CO(O^{\bullet})CH(OO^{\bullet})C(OH)(OH)CO(OH) \rightarrow 2 CO(O^{\bullet})CH(O^{\bullet})C(OH)(OH)CO(OH) + O_2$<br>$CO(O^{\bullet})CH(O^{\bullet})C(OH)(OH)CO(OH) \rightarrow CO(O^{\bullet})C^{\bullet}(OH)C(OH)(OH)CO(OH)$<br>$CO(O^{\bullet})C^{\bullet}(OH)C(OH)(OH)CO(OH) + O_2 \rightarrow CO(O^{\bullet})C(OH)(OO^{\bullet})C(OH)(OH)CO(OH)$<br>$2 CO(O^{\bullet})CH(OO^{\bullet})C(OH)(OH)CO(OH) \rightarrow 0.90 CO(OH)COC(OH)(OH)CO(O^{\bullet}) + 0.60 CO(OH)C(OH)(OH)CHO + 0.30 CO(O^{\bullet})CH(OH)C(OH)(OH)CO(OH) + 0.20 CO(O^{\bullet})C(OH)(OO^{\bullet})C(OH)(OH)CO(OH) + 0.60 CO_2 + 0.60 H_2O_2 + 0.60 OH^{\bullet} - 0.60 H_2O + 0.20 O_2$                                   | $2.2 \cdot 10^7$<br>$2.2 \cdot 10^7$<br>$2.2 \cdot 10^7$<br>$9.0 \cdot 10^6$<br><br><br>R(32) $7.5 \cdot 10^7$ |             |                          | BR: 30%<br>BR: 30%<br>BR: 30%<br>BR: 10%<br>9<br>2<br>= $k(2 CH_2(OO^{\bullet})CO(O^{\bullet})) - 10$ |
| Pathway 1: $2 CO(O^{\bullet})CH(OO^{\bullet})COCO(O^{\bullet}) \rightarrow 2 CO(O^{\bullet})COCOCO(O^{\bullet}) + H_2O_2$<br>Pathway 2: $2 CO(O^{\bullet})CH(OO^{\bullet})COCO(O^{\bullet}) (+ 2 H_2O) \rightarrow 2 CHOCOCO(O^{\bullet}) + 2 CO_2 + H_2O_2 + 2 OH^{\bullet}$<br>Pathway 3: $2 CO(O^{\bullet})CH(OO^{\bullet})COCO(O^{\bullet}) \rightarrow CO(O^{\bullet})CH(OH)COCO(O^{\bullet}) + CO(O^{\bullet})COCOCO(O^{\bullet}) + O_2$<br>Pathway 4: $2 CO(O^{\bullet})CH(OO^{\bullet})COCO(O^{\bullet}) \rightarrow CO(O^{\bullet})CH(O^{\bullet})COCO(O^{\bullet}) + O_2$<br>$CO(O^{\bullet})CH(O^{\bullet})COCO(O^{\bullet}) \rightarrow CO(O^{\bullet})C^{\bullet}(OH)COCO(O^{\bullet})$<br>$CO(O^{\bullet})C^{\bullet}(OH)COCO(O^{\bullet}) + O_2 \rightarrow CO(O^{\bullet})C(OH)(OO^{\bullet})COCO(O^{\bullet})$<br>$2 CO(O^{\bullet})CH(OO^{\bullet})COCO(O^{\bullet}) \rightarrow 0.90 CO(O^{\bullet})COCOCO(O^{\bullet}) + 0.60 CO(O^{\bullet})COCHO + 0.30 CO(O^{\bullet})CH(OH)COCO(O^{\bullet}) + 0.20 CO(O^{\bullet})C(OH)(OO^{\bullet})COCO(O^{\bullet}) + 0.60 CO_2 + 0.60 H_2O_2 + 0.60 OH^{\bullet} - 0.60 H_2O + 0.20 O_2$ | $2.2 \cdot 10^7$<br>$2.2 \cdot 10^7$<br>$2.2 \cdot 10^7$<br>$9.0 \cdot 10^6$<br><br><br>R(33) $7.5 \cdot 10^7$ |             |                          | BR: 30%<br>BR: 30%<br>BR: 30%<br>BR: 10%<br>9<br>2<br>= $k(2 CH_2(OO^{\bullet})CO(O^{\bullet})) - 10$ |
| <b>Oxidation of Malic Acid</b>                                                                                                                                                                                                                                                                                                                                                                                                                                                                                                                                                                                                                                                                                                                                                                                                                                                                                                                                                                                                                                                                                                                        |                                                                                                                |             |                          |                                                                                                       |
| Pathway 1: $CO(OH)CH_2CH(OH)CO(OH) + HO^{\bullet} \rightarrow CO(OH)CH_2CH(O^{\bullet})CO(OH) + H_2O$<br>$CO(OH)CH_2CH(O^{\bullet})CO(OH) \rightarrow CO(OH)CH_2CHO + C^{\bullet}O(OH)$<br>$C^{\bullet}O(OH) + O_2 \rightarrow CO(OH)(OO^{\bullet})$<br>Pathway 2: $CO(OH)CH_2CH(OH)CO(OH) + HO^{\bullet} \rightarrow CO(OH)CH_2C^{\bullet}(OH)CO(OH) + H_2O$<br>$CO(OH)CH_2C^{\bullet}(OH)CO(OH) + O_2 \rightarrow CO(OH)CH_2C(OH)(OO^{\bullet})CO(OH)$<br>$CO(OH)CH_2CH(OH)CO(OH) + HO^{\bullet} \rightarrow 0.50 CO(OH)CH_2CHO + 0.50 CO(OH)(OO^{\bullet}) + 0.50 CO(OH)CH_2C(OH)(OO^{\bullet})CO(OH) + H_2O - O_2$                                                                                                                                                                                                                                                                                                                                                                                                                                                                                                                                | $1.8 \cdot 10^8$<br><br><br>$2.0 \cdot 10^9$<br>$1.8 \cdot 10^8$<br>$2.0 \cdot 10^9$<br>R(34) $3.6 \cdot 10^8$ |             | Herrmann<br>et al., 2010 | BR: 50% - 19<br>5 - 6<br>2<br>BR: 50% - 19<br>2                                                       |
| Pathway 1: $CO(OH)CH_2CH(OH)CO(OH) + NO_3^{\bullet} \rightarrow CO(OH)CH_2C^{\bullet}(OH)CO(OH) + NO_3^- + H^+$<br>$CO(OH)CH_2C^{\bullet}(OH)CO(OH) + O_2 \rightarrow CO(OH)CH_2C(OH)(OO^{\bullet})CO(OH)$<br>$CO(OH)CH_2CH(OH)CO(OH) + NO_3^{\bullet} \rightarrow CO(OH)CH_2C(OH)(OO^{\bullet})CO(OH) + NO_3^- + H^+ - O_2$                                                                                                                                                                                                                                                                                                                                                                                                                                                                                                                                                                                                                                                                                                                                                                                                                          | $5.1 \cdot 10^4$<br>$2.0 \cdot 10^9$<br>R(35) $5.1 \cdot 10^4$                                                 |             |                          | BR: 100%<br>2<br>= $k(CO(OH)CH(OH)CO(OH) + NO_3^{\bullet}) - 3$                                       |
| Pathway 1: $CO(OH)CH_2CH(OH)CO(O^{\bullet}) + HO^{\bullet} \rightarrow CO(OH)CH_2C^{\bullet}(OH)CO(O^{\bullet}) + H_2O$<br>$CO(OH)CH_2C^{\bullet}(OH)CO(O^{\bullet}) + O_2 \rightarrow CO(OH)CH_2C(OH)(OO^{\bullet})CO(O^{\bullet})$<br>Pathway 2: $CO(OH)CH_2CH(OH)CO(O^{\bullet}) + HO^{\bullet} \rightarrow CO(OH)CH_2CH(OH)CO(O^{\bullet}) + OH^{\bullet}$                                                                                                                                                                                                                                                                                                                                                                                                                                                                                                                                                                                                                                                                                                                                                                                        | $2.1 \cdot 10^8$<br>$2.0 \cdot 10^9$<br>$1.2 \cdot 10^8$                                                       |             |                          | BR: 48% - 20<br>2<br>BR: 27% - 20                                                                     |

| Reactions                                                                                                                                                                                                                                     | $k_{298}$<br>( $M^{-n+1} s^{-1}$ ) | Ea/R<br>(K) | References               | Notes                                                                       |
|-----------------------------------------------------------------------------------------------------------------------------------------------------------------------------------------------------------------------------------------------|------------------------------------|-------------|--------------------------|-----------------------------------------------------------------------------|
| CO(OH)CH <sub>2</sub> CH(OH)CO(O <sup>•</sup> ) → CO(OH)CH <sub>2</sub> C <sup>•</sup> H(OH) + CO <sub>2</sub>                                                                                                                                |                                    |             |                          | 5 - 6                                                                       |
| CO(OH)CH <sub>2</sub> C <sup>•</sup> H(OH) + O <sub>2</sub> → CO(OH)CH <sub>2</sub> CH(OH)(OO <sup>•</sup> )                                                                                                                                  | 2.0 10 <sup>9</sup>                |             |                          | 2                                                                           |
| Pathway 3: CO(OH)CH <sub>2</sub> CH(OH)CO(O <sup>-</sup> ) + HO <sup>•</sup> → CO(OH)CH <sub>2</sub> CH(O <sup>•</sup> )CO(O <sup>-</sup> ) + H <sub>2</sub> O                                                                                | 1.1 10 <sup>8</sup>                |             |                          | BR: 25% - 20                                                                |
| CO(OH)CH <sub>2</sub> CH(O <sup>•</sup> )CO(O <sup>-</sup> ) → CO(OH)CH <sub>2</sub> CHO + C <sup>•</sup> O(O <sup>-</sup> )                                                                                                                  |                                    |             |                          | 5 - 6                                                                       |
| C <sup>•</sup> O(O <sup>-</sup> ) + O <sub>2</sub> → CO(O <sup>-</sup> )(OO <sup>•</sup> )                                                                                                                                                    | 2.0 10 <sup>9</sup>                |             |                          | 2                                                                           |
| CO(OH)CH <sub>2</sub> CH(OH)CO(O <sup>-</sup> ) + HO <sup>•</sup> → 0.48 CO(OH)CH <sub>2</sub> C(OH)(OO <sup>•</sup> )CO(O <sup>-</sup> ) + 0.27 CH(OH)(OO <sup>•</sup> )CH <sub>2</sub> CO(OH) + 0.25                                        | R(36) 4.8 10 <sup>9</sup>          |             | Herrmann<br>et al., 2010 | 21                                                                          |
| CO(OH)CH <sub>2</sub> CHO + 0.25 CO(O <sup>-</sup> )(OO <sup>•</sup> ) + 0.27 CO <sub>2</sub> + 0.27 OH <sup>-</sup> + 0.73 H <sub>2</sub> O - O <sub>2</sub>                                                                                 |                                    |             |                          |                                                                             |
| Pathway 1: CO(OH)CH <sub>2</sub> CH(OH)CO(O <sup>-</sup> ) + NO <sub>3</sub> <sup>•</sup> → CO(OH)CH <sub>2</sub> C <sup>•</sup> (OH)CO(O <sup>-</sup> ) + NO <sub>3</sub> <sup>-</sup> + H <sup>+</sup>                                      | 5.6 10 <sup>6</sup>                | 3369        |                          | BR: 100%                                                                    |
| CO(OH)CH <sub>2</sub> C <sup>•</sup> (OH)CO(O <sup>-</sup> ) + O <sub>2</sub> → CO(OH)CH <sub>2</sub> C(OH)(OO <sup>•</sup> )CO(O <sup>-</sup> )                                                                                              | 2.0 10 <sup>9</sup>                |             |                          | 2                                                                           |
| CO(OH)CH <sub>2</sub> CH(OH)CO(O <sup>-</sup> ) + NO <sub>3</sub> <sup>•</sup> → CO(OH)CH <sub>2</sub> C(OH)(OO <sup>•</sup> )CO(O <sup>-</sup> ) + NO <sub>3</sub> <sup>-</sup> + H <sup>+</sup> - O <sub>2</sub>                            | R(37) 5.6 10 <sup>6</sup>          | 3369        |                          | = k(CO(OH)CH(OH)CO(O <sup>-</sup> ) + NO <sub>3</sub> <sup>•</sup> )<br>- 3 |
| Pathway 1: CO(O <sup>-</sup> )CH <sub>2</sub> CH(OH)CO(OH) + HO <sup>•</sup> → CO(O <sup>•</sup> )CH <sub>2</sub> CH(OH)CO(OH) + OH <sup>-</sup>                                                                                              | 3.5 10 <sup>8</sup>                |             |                          | BR: 73% - 22                                                                |
| CO(O <sup>•</sup> )CH <sub>2</sub> CH(OH)CO(OH) → C <sup>•</sup> H <sub>2</sub> CH(OH)CO(OH) + CO <sub>2</sub>                                                                                                                                |                                    |             |                          | 5 - 6                                                                       |
| C <sup>•</sup> H <sub>2</sub> CH(OH)CO(OH) + O <sub>2</sub> → CH <sub>2</sub> (OO <sup>•</sup> )CH(OH)CO(OH)                                                                                                                                  | 2.0 10 <sup>9</sup>                |             |                          | 2                                                                           |
| Pathway 2: CO(O <sup>-</sup> )CH <sub>2</sub> CH(OH)CO(OH) + HO <sup>•</sup> → CO(O <sup>-</sup> )CH <sub>2</sub> C <sup>•</sup> (OH)CO(OH) + H <sub>2</sub> O                                                                                | 1.3 10 <sup>8</sup>                |             |                          | BR: 27% - 22                                                                |
| CO(O <sup>-</sup> )CH <sub>2</sub> C <sup>•</sup> (OH)CO(OH) + O <sub>2</sub> → CO(O <sup>-</sup> )CH <sub>2</sub> C(OH)(OO <sup>•</sup> )CO(OH)                                                                                              | 2.0 10 <sup>9</sup>                |             |                          | 2                                                                           |
| CO(O <sup>-</sup> )CH <sub>2</sub> CH(OH)CO(OH) + HO <sup>•</sup> → 0.27 CO(O <sup>-</sup> )CH <sub>2</sub> C(OH)(OO <sup>•</sup> )CO(OH) + 0.73 CH <sub>2</sub> (OO <sup>•</sup> )CH(OH)CO(OH) + 0.73 CO <sub>2</sub>                        | R(38) 4.8 10 <sup>9</sup>          |             | Herrmann<br>et al., 2010 | 21                                                                          |
| + 0.73 OH <sup>-</sup> + 0.27 H <sub>2</sub> O - O <sub>2</sub>                                                                                                                                                                               |                                    |             |                          |                                                                             |
| Pathway 1: CO(O <sup>-</sup> )CH <sub>2</sub> CH(OH)CO(OH) + NO <sub>3</sub> <sup>•</sup> → CO(O <sup>-</sup> )CH <sub>2</sub> C <sup>•</sup> (OH)CO(OH) + NO <sub>3</sub> <sup>-</sup> + H <sup>+</sup>                                      | 5.1 10 <sup>4</sup>                |             |                          | BR: 100%                                                                    |
| CO(O <sup>-</sup> )CH <sub>2</sub> C <sup>•</sup> (OH)CO(OH) + O <sub>2</sub> → CO(O <sup>-</sup> )CH <sub>2</sub> C(OH)(OO <sup>•</sup> )CO(OH)                                                                                              | 2.0 10 <sup>9</sup>                |             |                          | 2                                                                           |
| CO(O <sup>-</sup> )CH <sub>2</sub> CH(OH)CO(OH) + NO <sub>3</sub> <sup>•</sup> → CO(O <sup>-</sup> )CH <sub>2</sub> C(OH)(OO <sup>•</sup> )CO(OH) + NO <sub>3</sub> <sup>-</sup> + H <sup>+</sup> - O <sub>2</sub>                            | R(39) 5.1 10 <sup>4</sup>          |             |                          | = k(CO(OH)CH(OH)CO(OH) +<br>NO <sub>3</sub> <sup>•</sup> ) - 3              |
| Pathway 1: CO(O <sup>-</sup> )CH <sub>2</sub> CH(OH)CO(O <sup>-</sup> ) + HO <sup>•</sup> → CO(O <sup>-</sup> )CH <sub>2</sub> C <sup>•</sup> (OH)CO(O <sup>-</sup> ) + H <sub>2</sub> O                                                      | 4.5 10 <sup>8</sup>                |             |                          | BR: 48% - 23                                                                |
| CO(O <sup>-</sup> )CH <sub>2</sub> C <sup>•</sup> (OH)CO(O <sup>-</sup> ) + O <sub>2</sub> → CO(O <sup>-</sup> )CH <sub>2</sub> C(OH)(OO <sup>•</sup> )CO(O <sup>-</sup> )                                                                    | 2.0 10 <sup>9</sup>                |             |                          | 2                                                                           |
| Pathway 2: CO(O <sup>-</sup> )CH <sub>2</sub> CH(OH)CO(O <sup>-</sup> ) + HO <sup>•</sup> → CO(O <sup>•</sup> )CH <sub>2</sub> CH(OH)CO(O <sup>-</sup> ) + OH <sup>-</sup>                                                                    | 3.4 10 <sup>8</sup>                |             |                          | BR: 37% - 23                                                                |
| CO(O <sup>•</sup> )CH <sub>2</sub> CH(OH)CO(O <sup>-</sup> ) → C <sup>•</sup> H <sub>2</sub> CH(OH)CO(O <sup>-</sup> ) + CO <sub>2</sub>                                                                                                      |                                    |             |                          | 5 - 6                                                                       |
| C <sup>•</sup> H <sub>2</sub> CH(OH)CO(O <sup>-</sup> ) + O <sub>2</sub> → CH <sub>2</sub> (OO <sup>•</sup> )CH(OH)CO(O <sup>-</sup> )                                                                                                        | 2.0 10 <sup>9</sup>                |             |                          | 2                                                                           |
| Pathway 3: CO(O <sup>-</sup> )CH <sub>2</sub> CH(OH)CO(O <sup>-</sup> ) + HO <sup>•</sup> → CO(O <sup>-</sup> )CH <sub>2</sub> CH(OH)CO(O <sup>•</sup> ) + OH <sup>-</sup>                                                                    | 1.4 10 <sup>8</sup>                |             |                          | BR: 15% - 23                                                                |
| CO(O <sup>-</sup> )CH <sub>2</sub> CH(OH)CO(O <sup>•</sup> ) → CO(O <sup>-</sup> )CH <sub>2</sub> C <sup>•</sup> H(OH) + CO <sub>2</sub>                                                                                                      |                                    |             |                          | 5 - 6                                                                       |
| CO(O <sup>-</sup> )CH <sub>2</sub> C <sup>•</sup> H(OH) + O <sub>2</sub> → CO(O <sup>-</sup> )CH <sub>2</sub> CH(OH)(OO <sup>•</sup> )                                                                                                        | 2.0 10 <sup>9</sup>                |             |                          | 2                                                                           |
| CO(O <sup>-</sup> )CH <sub>2</sub> CH(OH)CO(O <sup>-</sup> ) + HO <sup>•</sup> → 0.48 CO(O <sup>-</sup> )CH <sub>2</sub> C(OH)(OO <sup>•</sup> )CO(O <sup>-</sup> ) + 0.37 CH <sub>2</sub> (OO <sup>•</sup> )CH(OH)CO(O <sup>-</sup> ) + 0.15 | R(40) 8.5 10 <sup>8</sup>          |             | Herrmann<br>et al., 2010 |                                                                             |
| CH(OH)(OO <sup>•</sup> )CH <sub>2</sub> CO(O <sup>-</sup> ) + 0.52 CO <sub>2</sub> + 0.52 OH <sup>-</sup> + 0.48 H <sub>2</sub> O - O <sub>2</sub>                                                                                            |                                    |             |                          |                                                                             |
| Pathway 1: CO(O <sup>-</sup> )CH <sub>2</sub> CH(OH)CO(O <sup>-</sup> ) + NO <sub>3</sub> <sup>•</sup> → CO(O <sup>-</sup> )CH <sub>2</sub> C <sup>•</sup> (OH)CO(O <sup>-</sup> ) + NO <sub>3</sub> <sup>-</sup> + H <sup>+</sup>            | 5.6 10 <sup>6</sup>                | 3369        |                          | BR: 100%                                                                    |
| CO(O <sup>-</sup> )CH <sub>2</sub> C <sup>•</sup> (OH)CO(O <sup>-</sup> ) + O <sub>2</sub> → CO(O <sup>-</sup> )CH <sub>2</sub> C(OH)(OO <sup>•</sup> )CO(O <sup>-</sup> )                                                                    | 2.0 10 <sup>9</sup>                |             |                          | 2                                                                           |
| CO(O <sup>-</sup> )CH <sub>2</sub> CH(OH)CO(O <sup>-</sup> ) + NO <sub>3</sub> <sup>•</sup> → CO(O <sup>-</sup> )CH <sub>2</sub> C(OH)(OO <sup>•</sup> )CO(O <sup>-</sup> ) + NO <sub>3</sub> <sup>-</sup> + H <sup>+</sup> - O <sub>2</sub>  | R(41) 5.6 10 <sup>6</sup>          | 3369        |                          | = k(CO(OH)CH(OH)CO(O <sup>-</sup> ) + NO <sub>3</sub> <sup>•</sup> )<br>- 3 |
| <b>Oxidation of Tartric Acid</b>                                                                                                                                                                                                              |                                    |             |                          |                                                                             |
| Pathway 1: CO(OH)CH(OH)CH(OH)CO(OH) + HO <sup>•</sup> → CO(OH)CH(O <sup>•</sup> )CH(OH)CO(OH) + H <sub>2</sub> O                                                                                                                              | 1.1 10 <sup>8</sup>                |             |                          | BR: 70% - 24                                                                |
| CO(OH)CH(O <sup>•</sup> )CH(OH)CO(OH) → C <sup>•</sup> O(OH) + CHOCH(OH)CO(OH)                                                                                                                                                                |                                    |             |                          | 5 - 6                                                                       |
| C <sup>•</sup> O(OH) + O <sub>2</sub> → CO(OH)(OO <sup>•</sup> )                                                                                                                                                                              | 2.0 10 <sup>9</sup>                |             |                          | 2                                                                           |
| Pathway 2: CO(OH)CH(OH)CH(OH)CO(OH) + HO <sup>•</sup> → CO(OH)C <sup>•</sup> (OH)CH(OH)CO(OH) + H <sub>2</sub> O                                                                                                                              | 5.0 10 <sup>7</sup>                |             |                          | BR: 30% - 24                                                                |
| CO(OH)C <sup>•</sup> (OH)CH(OH)CO(OH) + O <sub>2</sub> → CO(OH)C(OH)(OO <sup>•</sup> )CH(OH)CO(OH)                                                                                                                                            | 2.0 10 <sup>9</sup>                |             |                          | 2                                                                           |
| CO(OH)CH(OH)CH(OH)CO(OH) + HO <sup>•</sup> → 0.70 CHOCH(OH)CO(OH) + 0.70 CO(OH)(OO <sup>•</sup> ) + 0.30                                                                                                                                      | R(42) 1.6 10 <sup>8</sup>          |             |                          | 8                                                                           |
| CO(OH)CH(OH)C(OH)(OO <sup>•</sup> )CO(OH) + H <sub>2</sub> O - O <sub>2</sub>                                                                                                                                                                 |                                    |             |                          |                                                                             |
| Pathway 1: CO(OH)CH(OH)CH(OH)CO(OH) + NO <sub>3</sub> <sup>•</sup> → CO(OH)C <sup>•</sup> (OH)CH(OH)CO(OH) + NO <sub>3</sub> <sup>-</sup> + H <sup>+</sup>                                                                                    | 5.1 10 <sup>4</sup>                |             |                          | BR: 100%                                                                    |

| Reactions                                                                                                                                                                                                    |       | $k_{298}$<br>( $M^{-n+1} s^{-1}$ ) | Ea/R<br>(K) | References | Notes                                                            |
|--------------------------------------------------------------------------------------------------------------------------------------------------------------------------------------------------------------|-------|------------------------------------|-------------|------------|------------------------------------------------------------------|
| $CO(OH)C^*(OH)CH(OH)CO(OH) + O_2 \rightarrow CO(OH)C(OH)(OO^*)CH(OH)CO(OH)$                                                                                                                                  |       | $2.0 \cdot 10^9$                   |             |            | 2                                                                |
| $CO(OH)CH(OH)CH(OH)CO(OH) + NO_3^* \rightarrow CO(OH)CH(OH)C(OH)(OO^*)CO(OH) + NO_3^- + H^+ - O_2$                                                                                                           | R(43) | $5.1 \cdot 10^4$                   |             |            | =k(CO(OH)CH(OH)CO(OH) + NO <sub>3</sub> <sup>*</sup> ) - 3       |
| Pathway 1: $CO(OH)CH(OH)CH(OH)CO(O^-) + HO^* \rightarrow CO(OH)CH(OH)CH(OH)CO(O^*) + OH^-$                                                                                                                   |       | $1.4 \cdot 10^8$                   |             |            | BR: 37% - 25                                                     |
| $CO(OH)CH(OH)CH(OH)CO(O^*) \rightarrow CO(OH)CH(OH)C^*H(OH) + CO_2$                                                                                                                                          |       |                                    |             |            | 5 - 6                                                            |
| $CO(OH)CH(OH)C^*H(OH) + O_2 \rightarrow CO(OH)CH(OH)CH(OH)(OO^*)$                                                                                                                                            |       | $2.0 \cdot 10^9$                   |             |            | 2                                                                |
| Pathway 2: $CO(OH)CH(OH)CH(OH)CO(O^-) + HO^* \rightarrow CO(OH)CH(OH)CH(O^*)CO(O^-) + H_2O$                                                                                                                  |       | $1.4 \cdot 10^8$                   |             |            | BR: 35% - 25                                                     |
| $CO(OH)CH(OH)CH(O^*)CO(O^-) \rightarrow CO(OH)CH(OH)CHO + C^*O(O^-)$                                                                                                                                         |       |                                    |             |            | 5 - 6                                                            |
| $C^*O(O^-) + O_2 \rightarrow CO(O^-)(OO^*)$                                                                                                                                                                  |       | $2.0 \cdot 10^9$                   |             |            | 2                                                                |
| Pathway 3: $CO(OH)CH(OH)CH(OH)CO(O^-) + HO^* \rightarrow CO(OH)CH(OH)C^*(OH)CO(O^-) + H_2O$                                                                                                                  |       | $1.1 \cdot 10^8$                   |             |            | BR: 28% - 25                                                     |
| $CO(OH)CH(OH)C^*(OH)CO(O^-) + O_2 \rightarrow CO(OH)CH(OH)C(OH)(OO^*)CO(O^-)$                                                                                                                                |       | $2.0 \cdot 10^9$                   |             |            | 2                                                                |
| $CO(OH)CH(OH)CH(OH)CO(O^-) + HO^* \rightarrow 0.37 CH(OH)(OO^*)CH(OH)CO(OH) + 0.35 CHOCH(OH)CO(OH) + 0.35 CO(O^-)(OO^*) + 0.28 CO(OH)CH(OH)C(OH)(OO^*)CO(O^-) + 0.37 CO_2 + 0.37 OH^- + 0.63 H_2O - O_2$     | R(44) | $3.9 \cdot 10^8$                   |             |            | 8                                                                |
| Pathway 1: $CO(OH)CH(OH)CH(OH)CO(O^-) + NO_3^* \rightarrow CO(OH)CH(OH)C^*(OH)CO(O^-) + NO_3^- + H^+$                                                                                                        |       | $5.6 \cdot 10^6$                   | 3369        |            | BR: 100%                                                         |
| $CO(OH)CH(OH)C^*(OH)CO(O^-) + O_2 \rightarrow CO(OH)CH(OH)C(OH)(OO^*)CO(O^-)$                                                                                                                                |       |                                    |             |            |                                                                  |
| $CO(OH)CH(OH)CH(OH)CO(O^-) + NO_3^* \rightarrow CO(OH)CH(OH)C(OH)(OO^*)CO(O^-) + NO_3^- + H^+ - O_2$                                                                                                         | R(45) | $5.6 \cdot 10^6$                   | 3369        |            | =k(CO(OH)CH(OH)CO(O^-) + NO <sub>3</sub> <sup>*</sup> ) - 3      |
| Pathway 1: $CO(O^-)CH(OH)CH(OH)CO(O^-) + HO^* \rightarrow CO(O^-)CH(OH)C^*(OH)CO(O^-) + H_2O$                                                                                                                |       | $2.9 \cdot 10^8$                   |             |            | BR: 41% - 26                                                     |
| $CO(O^-)CH(OH)C^*(OH)CO(O^-) + O_2 \rightarrow CO(O^-)CH(OH)C(OH)(OO^*)CO(O^-)$                                                                                                                              |       | $2.0 \cdot 10^9$                   |             |            | 2                                                                |
| Pathway 2: $CO(O^-)CH(OH)CH(OH)CO(O^-) + HO^* \rightarrow CO(O^-)CH(OH)CH(OH)CO(O^*) + OH^-$                                                                                                                 |       | $2.1 \cdot 10^8$                   |             |            | BR: 31% - 26                                                     |
| $CO(O^-)CH(OH)CH(OH)CO(O^*) \rightarrow CO(O^-)CH(OH)C^*H(OH) + CO_2$                                                                                                                                        |       |                                    |             |            | 5 - 6                                                            |
| $CO(O^-)CH(OH)C^*H(OH) + O_2 \rightarrow CO(O^-)CH(OH)CH(OH)(OO^*)$                                                                                                                                          |       | $2.0 \cdot 10^9$                   |             |            | 2                                                                |
| Pathway 3: $CO(O^-)CH(OH)CH(OH)CO(O^-) + HO^* \rightarrow CO(O^-)CH(OH)CH(O^*)CO(O^-) + H_2O$                                                                                                                |       | $2.0 \cdot 10^8$                   |             |            | BR: 28% - 26                                                     |
| $CO(O^-)CH(OH)CH(O^*)CO(O^-) \rightarrow CO(O^-)CH(OH)CHO + C^*O(O^-)$                                                                                                                                       |       |                                    |             |            | 5 - 6                                                            |
| $C^*O(O^-) + O_2 \rightarrow CO(O^-)(OO^*)$                                                                                                                                                                  |       | $2.0 \cdot 10^9$                   |             |            | 2                                                                |
| $CO(O^-)CH(OH)CH(OH)CO(O^-) + HO^* \rightarrow 0.41 CO(O^-)CH(OH)C(OH)(OO^*)CO(O^-) + 0.31 CO(O^-)CH(OH)CH(OH)(OO^*) + 0.28 CO(O^-)CH(OH)CHO + 0.28 CO(O^-)(OO^*) + 0.31 CO_2 + 0.31 OH^- + 0.69 H_2O - O_2$ | R(46) | $7.0 \cdot 10^8$                   |             |            | 8                                                                |
| Pathway 1: $CO(O^-)CH(OH)CH(OH)CO(O^-) + NO_3^* \rightarrow CO(O^-)CH(OH)C^*(OH)CO(O^-) + NO_3^- + H^+$                                                                                                      |       | $5.6 \cdot 10^6$                   | 3369        |            | BR: 100%                                                         |
| $CO(O^-)CH(OH)C^*(OH)CO(O^-) + O_2 \rightarrow CO(O^-)CH(OH)C(OH)(OO^*)CO(O^-)$                                                                                                                              |       | $2.0 \cdot 10^9$                   |             |            | 2                                                                |
| $CO(O^-)CH(OH)CH(OH)CO(O^-) + NO_3^* \rightarrow CO(O^-)CH(OH)C(OH)(OO^*)CO(O^-) + NO_3^- + H^+$                                                                                                             | R(47) | $5.6 \cdot 10^6$                   | 3369        |            | =k(CO(OH)CH(OH)CO(O^-) + NO <sub>3</sub> <sup>*</sup> ) - 3      |
| $CO(OH)C(OH)(OO^*)CH(OH)CO(OH) + OH^- \rightarrow CO(OH)C(O^-)(OO^*)CH(OH)CO(OH) + H_2O$                                                                                                                     |       | $4.0 \cdot 10^9$                   |             |            |                                                                  |
| $CO(OH)C(O^-)(OO^*)CH(OH)CO(OH) \rightarrow CO(OH)COCO(OH)CO(OH) + O_2^{\bullet-}$                                                                                                                           |       |                                    |             |            | 11                                                               |
| $CO(OH)C(OH)(OO^*)CH(OH)CO(OH) + OH^- \rightarrow CO(OH)CH(OH)COCO(OH) + O_2^{\bullet-} + H_2O$                                                                                                              | R(48) | $4.0 \cdot 10^9$                   |             |            | = k(CH <sub>3</sub> CH(OH)(OO <sup>*</sup> ) + OH <sup>-</sup> ) |
| $CO(OH)C(OH)(OO^*)CH(OH)CO(OH) \rightarrow CO(OH)CH(OH)COCO(OH) + HO_2^*$                                                                                                                                    | R(49) | $1.9 \cdot 10^2$                   |             |            | 12                                                               |
| $CO(OH)CH(OH)C(OH)(OO^*)CO(O^-) + OH^- \rightarrow CO(OH)CH(OH)C(O^-)(OO^*)CO(O^-) + H_2O$                                                                                                                   |       | $4.0 \cdot 10^9$                   |             |            |                                                                  |
| $CO(OH)CH(OH)C(O^-)(OO^*)CO(O^-) \rightarrow CO(OH)CH(OH)COCO(O^-) + O_2^{\bullet-}$                                                                                                                         |       |                                    |             |            | 11                                                               |
| $CO(OH)CH(OH)C(OH)(OO^*)CO(O^-) + OH^- \rightarrow CO(OH)CH(OH)COCO(O^-) + O_2^{\bullet-} + H_2O$                                                                                                            | R(50) | $4.0 \cdot 10^9$                   |             |            | = k(CH <sub>3</sub> CH(OH)(OO <sup>*</sup> ) + OH <sup>-</sup> ) |
| $CO(OH)CH(OH)C(OH)(OO^*)CO(O^-) \rightarrow CO(OH)CH(OH)COCO(O^-) + HO_2^*$                                                                                                                                  | R(51) | $1.9 \cdot 10^2$                   |             |            | 12                                                               |
| $CO(O^-)CH(OH)C(OH)(OO^*)CO(OH) + OH^- \rightarrow CO(O^-)CH(OH)C(O^-)(OO^*)CO(OH) + H_2O$                                                                                                                   |       | $4.0 \cdot 10^9$                   |             |            |                                                                  |
| $CO(O^-)CH(OH)C(O^-)(OO^*)CO(OH) \rightarrow CO(O^-)CH(OH)COCO(OH) + O_2^{\bullet-}$                                                                                                                         |       |                                    |             |            | 11                                                               |
| $CO(O^-)CH(OH)C(OH)(OO^*)CO(OH) + OH^- \rightarrow CO(O^-)CH(OH)COCO(OH) + O_2^{\bullet-} + H_2O$                                                                                                            | R(52) | $4.0 \cdot 10^9$                   |             |            | = k(CH <sub>3</sub> CH(OH)(OO <sup>*</sup> ) + OH <sup>-</sup> ) |
| $CO(O^-)CH(OH)C(OH)(OO^*)CO(OH) \rightarrow CO(O^-)CH(OH)COCO(OH) + HO_2^*$                                                                                                                                  | R(53) | $1.9 \cdot 10^2$                   |             |            | 12                                                               |
| $CO(O^-)CH(OH)C(OH)(OO^*)CO(O^-) + OH^- \rightarrow CO(O^-)CH(OH)C(O^-)(OO^*)CO(O^-) + H_2O$                                                                                                                 |       | $4.0 \cdot 10^9$                   |             |            |                                                                  |
| $CO(O^-)CH(OH)C(O^-)(OO^*)CO(O^-) \rightarrow CO(O^-)CH(OH)COCO(O^-) + O_2^{\bullet-}$                                                                                                                       |       |                                    |             |            | 11                                                               |

| Reactions                                                                                                                                                                                                                                    |       | $k_{298}$<br>( $M^{-n+1} s^{-1}$ ) | Ea/R<br>(K) | References | Notes                                 |
|----------------------------------------------------------------------------------------------------------------------------------------------------------------------------------------------------------------------------------------------|-------|------------------------------------|-------------|------------|---------------------------------------|
| $CO(O^-)CH(OH)C(OH)(OO^\bullet)CO(O^-) + OH^- \rightarrow CO(O^-)CH(OH)COCO(O^-) + O_2^{\bullet-} + H_2O$                                                                                                                                    | R(54) | $4.0 \cdot 10^9$                   |             |            | $= k(CH_3CH(OH)(OO^\bullet) + OH^-)$  |
| $CO(O^-)CH(OH)C(OH)(OO^\bullet)CO(O^-) \rightarrow CO(O^-)CH(OH)COCO(O^-) + HO_2^\bullet$                                                                                                                                                    | R(55) | $1.9 \cdot 10^2$                   |             |            | 12                                    |
| <b>Oxidation of fumaric Acid</b>                                                                                                                                                                                                             |       |                                    |             |            |                                       |
| $CO(OH)CH=CHCO(OH) + HO^\bullet \rightarrow CO(OH)CH(OH)C^\bullet HCO(OH)$                                                                                                                                                                   |       | $6.0 \cdot 10^9$                   |             |            | BR: 100% - 27                         |
| $CO(OH)CH(OH)C^\bullet HCO(OH) + O_2 \rightarrow CO(OH)CH(OH)CH(OO^\bullet)CO(OH)$                                                                                                                                                           |       | $2.0 \cdot 10^9$                   |             |            | 2                                     |
| $Cis-CO(OH)CH=CHCO(OH) + HO^\bullet \rightarrow CO(OH)CH(OH)CH(OO^\bullet)CO(OH) + H_2O - O_2$                                                                                                                                               | R(56) | $5.9 \cdot 10^9$                   |             |            | 28                                    |
| $CO(O^-)CH=CHCO(OH) + HO^\bullet \rightarrow 0.50 CO(O^-)CH(OH)C^\bullet HCO(OH) + 0.50 CO(O^-)C^\bullet HCH(OH)CO(OH)$                                                                                                                      |       | $6.1 \cdot 10^9$                   |             |            | BR: 100% - 29                         |
| $CO(O^-)CH(OH)C^\bullet HCO(OH) + O_2 \rightarrow CO(O^-)CH(OH)CH(OO^\bullet)CO(OH)$                                                                                                                                                         |       | $2.0 \cdot 10^9$                   |             |            | 2                                     |
| $CO(O^-)C^\bullet HCH(OH)CO(OH) + O_2 \rightarrow CO(OH)CH(OH)CH(OO^\bullet)CO(O^-)$                                                                                                                                                         |       | $2.0 \cdot 10^9$                   |             |            | 2                                     |
| $Cis-CO(O^-)CH=CHCO(OH) + HO^\bullet \rightarrow 0.50 CO(O^-)CH(OH)CH(OO^\bullet)CO(OH) + 0.50 CO(OH)CH(OH)CH(OO^\bullet)CO(O^-) + H_2O - O_2$                                                                                               | R(57) | $6.1 \cdot 10^9$                   |             |            | 28                                    |
| $CO(O^-)CH=CHCO(O^-) + HO^\bullet \rightarrow CO(O^-)CH(OH)C^\bullet HCO(O^-)$                                                                                                                                                               |       | $6.3 \cdot 10^9$                   |             |            | BR: 100% - 30                         |
| $CO(O^-)CH(OH)C^\bullet HCO(O^-) + O_2 \rightarrow CO(O^-)CH(OH)CH(OO^\bullet)CO(O^-)$                                                                                                                                                       |       | $2.0 \cdot 10^9$                   |             |            | 2                                     |
| $Cis-CO(O^-)CH=CHCO(O^-) + HO^\bullet \rightarrow CO(O^-)CH(OH)CH(OO^\bullet)CO(O^-) + H_2O - O_2$                                                                                                                                           | R(58) | $6.3 \cdot 10^9$                   |             |            | 28                                    |
| Pathway 1: $2 CO(OH)CH(OH)CH(OO^\bullet)CO(OH) \rightarrow CO(OH)CH(OH)COCO(OH) + H_2O_2$                                                                                                                                                    |       | $2.2 \cdot 10^7$                   |             |            | BR: 30%                               |
| Pathway 2: $2 CO(OH)CH(OH)CH(OO^\bullet)CO(OH) (+ 2 H_2O) \rightarrow CHOCH(OH)CO(OH) + 2 CO_2 + H_2O_2 + 2 H_2O$                                                                                                                            |       | $2.2 \cdot 10^7$                   |             |            | BR: 30%                               |
| Pathway 3: $2 CO(OH)CH(OH)CH(OO^\bullet)CO(OH) \rightarrow CO(OH)CH(OH)CHOCO(OH) + CO(OH)CH(OH)CH(OH)CO(OH) + O_2$                                                                                                                           |       | $2.2 \cdot 10^7$                   |             |            | BR: 30%                               |
| Pathway 4: $2 CO(OH)CH(OH)CH(OO^\bullet)CO(OH) \rightarrow CO(OH)CH(OH)CH(O^\bullet)CO(OH) + O_2$                                                                                                                                            |       | $9.0 \cdot 10^6$                   |             |            | BR: 10%                               |
| $CO(OH)CH(OH)CH(O^\bullet)CO(OH) \rightarrow CO(OH)CH(OH)C^\bullet(OH)CO(OH)$                                                                                                                                                                |       |                                    |             |            | 9                                     |
| $CO(OH)CH(OH)C^\bullet(OH)CO(OH) \rightarrow CO(OH)CH(OH)C(OH)(OO^\bullet)CO(OH)$                                                                                                                                                            |       | $2.0 \cdot 10^9$                   |             |            | 2                                     |
| $2 CO(OH)CH(OH)CH(OO^\bullet)CO(OH) \rightarrow 0.90 CO(OH)CH(OH)COCO(OH) + 0.30 CO(OH)CH(OH)CH(OH)CO(OH) + 0.20 CO(OH)CH(OH)C(OH)(OO^\bullet)CO(OH) + 0.60 CHOCH(OH)CO(OH) + 0.60 CO_2 + 0.60 H_2O_2 + 0.20 O_2$                            | R(59) | $7.5 \cdot 10^7$                   |             |            | $= k(2 CH_2(OO^\bullet)CO(O^-)) - 10$ |
| Pathway 1: $2 CO(O^-)CH(OH)CH(OO^\bullet)CO(OH) \rightarrow CO(O^-)CH(OH)COCO(OH) + H_2O_2$                                                                                                                                                  |       | $2.2 \cdot 10^7$                   |             |            | BR: 30%                               |
| Pathway 2: $2 CO(O^-)CH(OH)CH(OO^\bullet)CO(OH) (+ 2 H_2O) \rightarrow CHOCH(OH)CO(O^-) + 2 CO_2 + H_2O_2 + 2 H_2O$                                                                                                                          |       | $2.2 \cdot 10^7$                   |             |            | BR: 30%                               |
| Pathway 3: $2 CO(O^-)CH(OH)CH(OO^\bullet)CO(OH) \rightarrow CO(O^-)CH(OH)CHOCO(OH) + CO(OH)CH(OH)CH(OH)CO(O^-) + O_2$                                                                                                                        |       | $2.2 \cdot 10^7$                   |             |            | BR: 30%                               |
| Pathway 4: $2 CO(O^-)CH(OH)CH(OO^\bullet)CO(OH) \rightarrow CO(O^-)CH(OH)CH(O^\bullet)CO(OH) + O_2$                                                                                                                                          |       | $9.0 \cdot 10^6$                   |             |            | BR: 10%                               |
| $CO(O^-)CH(OH)CH(O^\bullet)CO(OH) \rightarrow CO(O^-)CH(OH)C^\bullet(OH)CO(OH)$                                                                                                                                                              |       |                                    |             |            | 9                                     |
| $CO(O^-)CH(OH)C^\bullet(OH)CO(OH) \rightarrow CO(O^-)CH(OH)C(OH)(OO^\bullet)CO(OH)$                                                                                                                                                          |       | $2.0 \cdot 10^9$                   |             |            | 2                                     |
| $2 CO(O^-)CH(OH)CH(OO^\bullet)CO(OH) \rightarrow 0.90 CO(O^-)CH(OH)COCO(OH) + 0.30 CO(OH)CH(OH)CH(OH)CO(O^-) + 0.20 CO(O^-)CH(OH)C(OH)(OO^\bullet)CO(OH) + 0.60 CHOCH(OH)CO(O^-) + 0.60 CO_2 + 0.60 H_2O_2 + 0.20 O_2$                       | R(60) | $7.5 \cdot 10^7$                   |             |            | $= k(2 CH_2(OO^\bullet)CO(O^-)) - 10$ |
| Pathway 1: $2 CO(OH)CH(OH)CH(OO^\bullet)CO(O^-) \rightarrow CO(OH)CH(OH)COCO(O^-) + H_2O_2$                                                                                                                                                  |       | $2.2 \cdot 10^7$                   |             |            | BR: 30%                               |
| Pathway 2: $2 CO(OH)CH(OH)CH(OO^\bullet)CO(O^-) (+ 2 H_2O) \rightarrow CO(OH)CH(OH)CHO + 2 CO_2 + H_2O_2 + 2 OH^-$                                                                                                                           |       | $2.2 \cdot 10^7$                   |             |            | BR: 30%                               |
| Pathway 3: $2 CO(OH)CH(OH)CH(OO^\bullet)CO(O^-) \rightarrow CO(OH)CH(OH)CHOCO(O^-) + CO(OH)CH(OH)CH(OH)CO(O^-) + O_2$                                                                                                                        |       | $2.2 \cdot 10^7$                   |             |            | BR: 30%                               |
| Pathway 4: $2 CO(OH)CH(OH)CH(OO^\bullet)CO(O^-) \rightarrow CO(OH)CH(OH)CH(O^\bullet)CO(O^-) + O_2$                                                                                                                                          |       | $9.0 \cdot 10^6$                   |             |            | BR: 10%                               |
| $CO(OH)CH(OH)CH(O^\bullet)CO(O^-) \rightarrow CO(OH)CH(OH)C^\bullet(OH)CO(O^-)$                                                                                                                                                              |       |                                    |             |            | 9                                     |
| $CO(OH)CH(OH)C^\bullet(OH)CO(O^-) \rightarrow CO(OH)CH(OH)C(OH)(OO^\bullet)CO(O^-)$                                                                                                                                                          |       | $2.0 \cdot 10^9$                   |             |            | 2                                     |
| $2 CO(OH)CH(OH)CH(OO^\bullet)CO(O^-) \rightarrow 0.90 CO(OH)CH(OH)COCO(O^-) + 0.30 CO(OH)CH(OH)CH(OH)CO(O^-) + 0.20 CO(OH)CH(OH)C(OH)(OO^\bullet)CO(O^-) + 0.60 CO(OH)CH(OH)CHO + 0.60 CO_2 + 0.60 H_2O_2 + 0.60 OH^- - 0.6 H_2O + 0.20 O_2$ | R(61) | $7.5 \cdot 10^7$                   |             |            | $= k(2 CH_2(OO^\bullet)CO(O^-)) - 10$ |
| Pathway 1: $2 CO(O^-)CH(OH)CH(OO^\bullet)CO(O^-) \rightarrow CO(O^-)CH(OH)COCO(O^-) + H_2O_2$                                                                                                                                                |       | $2.2 \cdot 10^7$                   |             |            | BR: 30%                               |
| Pathway 2: $2 CO(O^-)CH(OH)CH(OO^\bullet)CO(O^-) (+ 2 H_2O) \rightarrow CHOCH(OH)CO(O^-) + 2 CO_2 + H_2O_2 + 2 OH^-$                                                                                                                         |       | $2.2 \cdot 10^7$                   |             |            | BR: 30%                               |
| Pathway 3: $2 CO(O^-)CH(OH)CH(OO^\bullet)CO(O^-) \rightarrow CO(O^-)CH(OH)CHOCO(O^-) + CO(O^-)CH(OH)CH(OH)CO(O^-) + O_2$                                                                                                                     |       | $2.2 \cdot 10^7$                   |             |            | BR: 30%                               |
| Pathway 4: $2 CO(O^-)CH(OH)CH(OO^\bullet)CO(O^-) \rightarrow CO(O^-)CH(OH)CH(O^\bullet)CO(O^-) + O_2$                                                                                                                                        |       | $9.0 \cdot 10^6$                   |             |            | BR: 10%                               |
| $CO(O^-)CH(OH)CH(O^\bullet)CO(O^-) \rightarrow CO(O^-)CH(OH)C^\bullet(OH)CO(O^-)$                                                                                                                                                            |       |                                    |             |            | 9                                     |

| Reactions                                                                                                                                                                                                                             |       | $k_{298}$<br>( $M^{-n+1} s^{-1}$ ) | Ea/R<br>(K) | References | Notes                           |
|---------------------------------------------------------------------------------------------------------------------------------------------------------------------------------------------------------------------------------------|-------|------------------------------------|-------------|------------|---------------------------------|
| $CO(O^-)CH(OH)C^*(OH)CO(O^-) \rightarrow CO(O^-)CH(OH)C(OH)(OO^*)CO(O^-)$                                                                                                                                                             |       | $2.0 \cdot 10^9$                   |             |            | 2                               |
| $2 CO(O^-)CH(OH)CH(OO^*)CO(O^-) \rightarrow 0.90 CO(O^-)CH(OH)COCO(O^-) + 0.30 CO(O^-)CH(OH)CH(OH)CO(O^-) + 0.20 CO(O^-)CH(OH)C(OH)(OO^*)CO(O^-) + 0.60 CHOCH(OH)CO(O^-) + 0.60 CO_2 + 0.60 H_2O_2 + 0.60 OH^- - 0.6 H_2O + 0.20 O_2$ | R(62) | $7.5 \cdot 10^7$                   |             |            | = $k(2 CH_2(OO^*)CO(O^-)) - 10$ |
| <b>Oxidation of maleic Acid</b>                                                                                                                                                                                                       |       |                                    |             |            |                                 |
| $CO(OH)CH=CHCO(OH) + HO^* \rightarrow CO(OH)CH(OH)C^*HCO(OH)$                                                                                                                                                                         |       | $3.4 \cdot 10^9$                   |             |            | BR: 100% - 31                   |
| $CO(OH)CH(OH)C^*HCO(OH) + O_2 \rightarrow CO(OH)CH(OH)CH(OO^*)CO(OH)$                                                                                                                                                                 |       | $2.0 \cdot 10^9$                   |             |            | 2                               |
| $Trans-CO(OH)CH=CHCO(OH) + HO^* \rightarrow CO(OH)CH(OH)CH(OO^*)CO(OH) + H_2O - O_2$                                                                                                                                                  | R(63) | $3.4 \cdot 10^9$                   |             |            | 28                              |
| $CO(O^-)CH=CHCO(OH) + HO^* \rightarrow 0.50 CO(O^-)CH(OH)C^*HCO(OH) + 0.50 CO(O^-)C^*HCH(OH)CO(OH)$                                                                                                                                   |       | $3.5 \cdot 10^9$                   |             |            | BR: 100% - 32                   |
| $CO(O^-)CH(OH)C^*HCO(OH) + O_2 \rightarrow CO(O^-)CH(OH)CH(OO^*)CO(OH)$                                                                                                                                                               |       | $2.0 \cdot 10^9$                   |             |            | 2                               |
| $CO(O^-)C^*HCH(OH)CO(OH) + O_2 \rightarrow CO(O^-)CH(OO^*)CH(OH)CO(OH)$                                                                                                                                                               |       | $2.0 \cdot 10^9$                   |             |            | 2                               |
| $Trans-CO(O^-)CH=CHCO(OH) + HO^* \rightarrow 0.50 CO(O^-)CH(OH)CH(OO^*)CO(OH) + 0.50 CO(O^-)CH(OO^*)CH(OH)CO(OH) + H_2O - O_2$                                                                                                        | R(64) | $3.5 \cdot 10^9$                   |             |            | 28                              |
| $CO(O^-)CH=CHCO(O^-) + HO^* \rightarrow CO(O^-)CH(OH)C^*HCO(O^-)$                                                                                                                                                                     |       | $3.7 \cdot 10^9$                   |             |            | BR: 100% - 33                   |
| $CO(O^-)CH(OH)C^*HCO(O^-) + O_2 \rightarrow CO(O^-)CH(OH)CH(OO^*)CO(O^-)$                                                                                                                                                             |       | $2.0 \cdot 10^9$                   |             |            | 2                               |
| $Trans-CO(O^-)CH=CHCO(O^-) + HO^* \rightarrow CO(O^-)CH(OH)CH(OO^*)CO(O^-) + H_2O - O_2$                                                                                                                                              | R(65) | $3.7 \cdot 10^9$                   |             |            | 28                              |

1 - Branching ratios are calculated by the SAR from Doussin and Monod (2013) : 100% for CH<sub>2</sub>.

2 - We assumed a fast rate constant equal to  $2.0 \cdot 10^9 M^{-1} s^{-1}$  based on values compiled in Neta et al. (1990). This reaction is not a rate-determining step.

3 - The oxidation by the radicals (NO<sub>3</sub><sup>•</sup>, SO<sub>4</sub><sup>•-</sup>, Cl<sup>•</sup>, Cl<sub>2</sub><sup>•-</sup>, CO<sub>3</sub><sup>•-</sup>) is supposed to produce the same R(OO<sup>•</sup>) as the oxidation by HO<sup>•</sup> with the same branching ratios. The electron transfer pathways are not considered for these radicals. The H abstraction on an (OH) group by the NO<sub>3</sub><sup>•</sup> radical is also neglected because this reaction is thermodynamically disfavored.

4 - Branching ratios are calculated by the SAR from Doussin and Monod (2013) : 58% for the electron transfer, 28% for CH<sub>2</sub> on CH<sub>2</sub>CO(O<sup>-</sup>), 14% for CH<sub>2</sub> on CH<sub>2</sub>CO(OH). The first two pathways are considered corresponding to 86% of the total reactivity. They have been scaled to 68/32%.

5 - Hilborn and Pincock (1991) showed that acyl alkoxyl radical RCO(O<sup>•</sup>) are fragmented with a rate constant around  $1.0 \cdot 10^9 s^{-1}$ . We assumed that the alkoxy fragmentation is non limiting.

6 - For alkoxyl radical, we assume an electron transfer reaction. When an oxygenated functional group is in β-position, we assume a fragmentation of the corresponding c-c bond. When there are two oxygenated function in β-position, we assume that the fragmentation occurs in priority on the C-CO(OH) bond.

7 - Branching ratios are calculated by the SAR from Doussin and Monod (2013) : 55% for the electron transfer and 45% on CH<sub>2</sub>. The first two pathways are considered corresponding to 100% of the total reactivity.

8 - Rate constant calculated from Doussin and Monod (2013).

9 - DeCosta and Pincock (1989) showed that electron transfer proceeds with a rate constant around  $1.0 \cdot 10^{10} s^{-1}$ . We assumed that the electron transfer is non limiting.

10 - For self-reaction of peroxy radicals, we follow these similarity criteria :

| Peroxyl categories                                                 | Model compounds                                        | References               |
|--------------------------------------------------------------------|--------------------------------------------------------|--------------------------|
| >C(OO <sup>•</sup> )CO(OH)/>C(OO <sup>•</sup> )CO(O <sup>-</sup> ) | CH <sub>2</sub> (OO <sup>•</sup> )CO(O <sup>-</sup> )  | Schuchmann et al. (1985) |
| >C(OH)C(OO <sup>•</sup> )<                                         | CH <sub>2</sub> (OH)CH <sub>2</sub> (OO <sup>•</sup> ) | Piesiak et al. (1984)    |
| >COC(OO <sup>•</sup> )<                                            | CH <sub>3</sub> COCH <sub>2</sub> (OO <sup>•</sup> )   | Zegota et al. (1986)     |
| Others                                                             | CH <sub>3</sub> CH <sub>2</sub> (OO <sup>•</sup> )     | Monod et al. (2007)      |

11 - Non-limiting reaction following Bothe et al. (1978).

12 - The HO<sub>2</sub><sup>•</sup> elimination rate constant depends on the substituent attached to the carbon atom bearing the peroxy function.



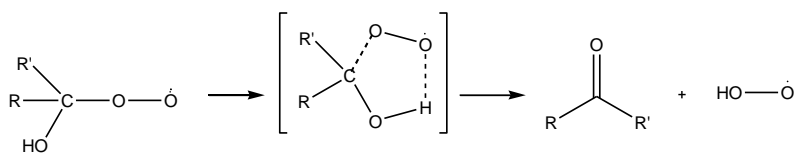

Von Sonntag (1987) compiled the following rate constants for :

| R               | R'                   | k (s <sup>-1</sup> ) |
|-----------------|----------------------|----------------------|
| H               | H                    | <10                  |
| H               | CH <sub>3</sub>      | 52                   |
| H               | CH <sub>2</sub> (OH) | 190                  |
| CH <sub>3</sub> | CH <sub>3</sub>      | 665                  |

13 - Oxaloacetic acid hydration is estimated to  $K_h = 18$ . The hydrate represents 95% of the total species. Therefore only the reactivity of the hydrate is considered. The first oxaloacetate monoanion ( $\text{CO}(\text{OH})\text{CH}_2\text{COCO}(\text{O}^-)$ ) hydration is estimated to  $K_h = 0.12$ . The hydrate represents 11% of the total species. Therefore only the reactivity of the hydrated form is considered. The second oxaloacetate monoanion ( $\text{CO}(\text{O}^-)\text{CH}_2\text{COCO}(\text{OH})$ ) hydration is estimated to  $K_h = 2.4$ . The hydrate represents 70% of the total species. Therefore the reactivity of both hydrated and non hydrated ions is considered. The oxaloacetate dianion hydration is estimated to  $K_h = 0.02$ . The hydrate represents 2% of the total species. Therefore only the reactivity of the non hydrated form is considered.

14 - Branching ratios are calculated by the SAR from Doussin and Monod (2013) : 98% for OH on  $\text{C}(\text{OH})(\text{OH})$  and 2% on  $\text{CH}_2$ . The first pathway is considered corresponding to 98% of the total reactivity. It has been scaled to 100%.

15 - Branching ratios are calculated by the SAR from Doussin and Monod (2013) : 80% for the electron transfer and 20% on  $\text{CH}_2$ . The first pathway is considered corresponding to 80% of the total reactivity. It has been scaled to 100%.

16 - Branching ratios are calculated by the SAR from Doussin and Monod (2013) : 90% for the electron transfer and 10% on  $\text{CH}_2$ . The first pathway is considered corresponding to 90% of the total reactivity. It has been scaled to 100%.

17 - Branching ratios are calculated by the SAR from Doussin and Monod (2013) : 48% for the electron transfer, 48% for OH on  $\text{C}(\text{OH})(\text{OH})$  and 2% on  $\text{CH}_2$ . The first two pathways are considered corresponding to 96% of the total reactivity. They have been scaled to 50/50%.

18 - Branching ratios are calculated by the SAR from Doussin and Monod (2013) : 71% for the electron transfer on  $\text{CH}_2\text{CO}(\text{O}^-)$ , 16% for the electron transfer on  $\text{COCO}(\text{O}^-)$  and 13% on  $\text{CH}_2$ . The first two pathways are considered corresponding to 87% of the total reactivity. They have been scaled to 82/18%.

19 - Branching ratios are calculated by the SAR from Doussin and Monod (2013) : 44% for OH on  $\text{CH}(\text{OH})$ , 44% for on CH on  $\text{CH}(\text{OH})$  and 12% on  $\text{CH}_2$ . The first two pathways are considered corresponding to 88% of the total reactivity. They have been scaled to 50/50%.

20 - Branching ratios are calculated by the SAR from Doussin and Monod (2013) : 45% for CH on  $\text{CH}(\text{OH})$ , 25% for the electron transfer, 23% for OH on  $\text{CH}(\text{OH})$  and 7% on  $\text{CH}_2$ . The first three pathways are considered corresponding to 93% of the total reactivity. They have been scaled to 48/27/25%.

21 - The global rate constant of both monoanions with HO is calculated by Gligoroski et al. (2009) for pH=4.3. The two mono-anions are supposed to be equally distributed because they have the same pKa. Therefore, the global rate constant is divided by two and applied to both monoanions.

22 - Branching ratios are calculated by the SAR from Doussin and Monod (2013) : 56% for the electron transfer, 21% for CH on  $\text{CH}(\text{OH})$ , 12% for OH on  $\text{CH}(\text{OH})$  and 11% on  $\text{CH}_2$ . The first two pathways are considered corresponding to 93% of the total reactivity. They have been scaled to 73/27%.

23 - Branching ratios are calculated by the SAR from Doussin and Monod (2013) : 38% for CH on  $\text{CH}(\text{OH})$ , 29% for the electron transfer on  $\text{CH}_2\text{CO}(\text{O}^-)$ , 12% for the electron transfer on  $\text{CH}(\text{OH})\text{CO}(\text{O}^-)$ , 11% for OH and 10% on  $\text{CH}_2$ . The first three pathways are considered corresponding to 79% of the total reactivity. They have been scaled to 48/37/15%.

24 - Branching ratios are calculated by the SAR from Doussin and Monod (2013) : 70% for OH on  $\text{CH}(\text{OH})$  and 30% for CH. The first two pathways are considered corresponding to 100% of the total reactivity.

25 - Branching ratios are calculated by the SAR from Doussin and Monod (2013) : 28% for the electron transfer, 26% for OH on  $\text{CH}(\text{OH})\text{CO}(\text{O}^-)$ , 21% for CH on  $\text{CH}(\text{OH})\text{CO}(\text{O}^-)$ , 14% for OH on  $\text{CH}(\text{OH})\text{CO}(\text{OH})$  and 11% for CH on  $\text{CH}(\text{OH})\text{CO}(\text{OH})$ . The first three pathways are considered corresponding to 75% of the total reactivity. They have been scaled to 37/35/28%.

26 - Branching ratios are calculated by the SAR from Doussin and Monod (2013) : 41% for CH, 31% for the electron transfer and 28% for OH. The first three pathways are considered corresponding to 100% of the total reactivity.

27 - For fumaric acid, we suppose that the addition on the external double bonded carbon is the main oxidation pathway. The SAR from Minakata et al. (2009) estimates a 95% branching ratio for this external addition on fumaric acid. This SAR estimates  $k_{\text{global}}$  equal to  $5.91 \cdot 10^9 \text{ M}^{-1} \text{ s}^{-1}$  with  $k_{\text{abs}} = 2.02 \cdot 10^8 \text{ M}^{-1} \text{ s}^{-1}$  and  $k_{\text{add}} = 5.71 \cdot 10^9 \text{ M}^{-1} \text{ s}^{-1}$ . The global rate constant is similar to the measured value ( $6.0 \cdot 10^9 \text{ M}^{-1} \text{ s}^{-1}$ ) from Cabelli and Bielski (1985).

28 - Rate constant calculated from Minakata et al. (2009).

---

29 - For fumarate monoanion, we suppose that the addition on the external double bonded carbon is the main oxidation pathway. The SAR from Minakata et al. (2009) estimates a 94% branching ratio for this external addition on fumaric acid. This SAR estimates  $k_{\text{global}}$  equal to  $6.12 \cdot 10^9 \text{ M}^{-1} \text{ s}^{-1}$  with  $k_{\text{abs}} = 2.02 \cdot 10^8 \text{ M}^{-1} \text{ s}^{-1}$ ,  $k_{\text{add}} = 5.71 \cdot 10^9 \text{ M}^{-1} \text{ s}^{-1}$  and  $k_{\text{electron transfer}} = 2.1 \cdot 10^8 \text{ M}^{-1} \text{ s}^{-1}$ . Two different radicals are formed  $\text{CO}(\text{O}^\cdot)\text{CH}(\text{OH})\text{C}^\cdot\text{HCO}(\text{OH})$  and  $\text{CO}(\text{O}^\cdot)\text{C}^\cdot\text{HCH}(\text{OH})\text{CO}(\text{OH})$  with equal probability (50/50).

30 - For fumarate dianion, we suppose that the addition on the external double bonded carbon is the main oxidation pathway. The SAR from Minakata et al. (2009) estimates a 90% branching ratio for this external addition on fumaric acid. This SAR estimates  $k_{\text{global}}$  equal to  $6.33 \cdot 10^9 \text{ M}^{-1} \text{ s}^{-1}$  with  $k_{\text{abs}} = 2.02 \cdot 10^8 \text{ M}^{-1} \text{ s}^{-1}$ ,  $k_{\text{add}} = 5.71 \cdot 10^9 \text{ M}^{-1} \text{ s}^{-1}$  and  $k_{\text{electron transfer}} = 2 \times 2.1 \cdot 10^8 \text{ M}^{-1} \text{ s}^{-1}$ .

31 - For maleic acid, we suppose that the addition on the external double bonded carbon is the main oxidation pathway. The SAR from Minakata et al. (2009) estimates a 97% branching ratio for this external addition on fumaric acid. This SAR estimates  $k_{\text{global}}$  equal to  $3.4 \cdot 10^9 \text{ M}^{-1} \text{ s}^{-1}$  with  $k_{\text{abs}} = 1.02 \cdot 10^8 \text{ M}^{-1} \text{ s}^{-1}$  and  $k_{\text{add}} = 3.3 \cdot 10^9 \text{ M}^{-1} \text{ s}^{-1}$ .

32 - For maleate monoanion, we suppose that the addition on the external double bonded carbon is the main oxidation pathway. The SAR from Minakata et al. (2009) estimates a 94% branching ratio for this external addition on fumaric acid. This SAR estimates  $k_{\text{global}}$  equal to  $3.51 \cdot 10^9 \text{ M}^{-1} \text{ s}^{-1}$  with  $k_{\text{abs}} = 1.02 \cdot 10^8 \text{ M}^{-1} \text{ s}^{-1}$ ,  $k_{\text{add}} = 3.3 \cdot 10^9 \text{ M}^{-1} \text{ s}^{-1}$  and  $k_{\text{electron transfer}} = 2.1 \cdot 10^8 \text{ M}^{-1} \text{ s}^{-1}$ . Two different radicals are formed  $\text{CO}(\text{O}^\cdot)\text{CH}(\text{OH})\text{C}^\cdot\text{HCO}(\text{OH})$  and  $\text{CO}(\text{O}^\cdot)\text{C}^\cdot\text{HCH}(\text{OH})\text{CO}(\text{OH})$  with equal probability (50/50).

33 - For maleate dianion, we suppose that the addition on the external double bonded carbon is the main oxidation pathway. The SAR from Minakata et al. (2009) estimates a 89% branching ratio for this external addition on fumaric acid. This SAR estimates  $k_{\text{global}}$  equal to  $3.73 \cdot 10^9 \text{ M}^{-1} \text{ s}^{-1}$  with  $k_{\text{abs}} = 2.02 \cdot 10^8 \text{ M}^{-1} \text{ s}^{-1}$ ,  $k_{\text{add}} = 5.71 \cdot 10^9 \text{ M}^{-1} \text{ s}^{-1}$  and  $k_{\text{electron transfer}} = 2 \times 2.1 \cdot 10^8 \text{ M}^{-1} \text{ s}^{-1}$ .

---

## References:

Bothe, E., Schuchmann, M. N., Schulte-Frohlinde, D., and Von Sonntag, C.:  $\text{HO}_2$  Elimination from  $\alpha$ -hydroxyalkylperoxyl radicals in aqueous solution, *Photochem. Photobiol.*, 28, 639-643, 1978.

Cabelli, D.E. and Bielski, B.H.J.: A pulse radiolysis study of some dicarboxylic acids of the citric acid cycle. The kinetics and spectral properties of the free radicals formed by reaction with the OH Radical, *Z. Naturforsch. B, Anorg. Chem., Org. Chem.*, 40B: 1731-1737.

DeCosta, D. P., and Pincock, J. A.: Control of product distribution by Marcus type electron-transfer rates for the radical pair generated in benzylic ester photochemistry, *J. Am. Chem. Soc.*, 111, 8948-8950, 1989.

Doussin, J. F., and Monod, A.: Structure–activity relationship for the estimation of OH-oxidation rate constants of carbonyl compounds in the aqueous phase, *Atmos. Chem. Phys.*, 13, 11625-11641, 2013.

Ervens, B., Gligorovski, S., and Herrmann, H.: Temperature-dependent rate constants for hydroxyl radical reactions with organic compounds in aqueous solutions, *Phys. Chem. Chem. Phys.*, 5, 2003.

Gligorovski, S., Rouse, D., George, C. H. and Herrmann, H.: Rate constants for the OH reactions with oxygenated organic compounds in aqueous solution, *Int. J. Chem. Kinet.*, 41, 309–326, 2009.

Herrmann, H., Hoffmann, D., Schaefer, T., Brüer, P., and Tilgner, A.: Tropospheric aqueous-phase free-radical chemistry: radical sources, spectra, reaction kinetics and prediction tools, *Chem. Phys. Chem.*, 11, 3796–3822, doi:10.1002/cphc.201000533, 2010.

Hilborn, J. W., and Pincock, J. A.: Rates of decarboxylation of acyloxy radicals formed in the photocleavage of substituted 1-naphthylmethyl alkanoates, *J. Am. Chem. Soc.*, 113, 2683-2686, 1991.

Minakata, D., Li, K., Westerhoff, P., and Crittenden, J.: Development of a group contribution method to predict aqueous phase hydroxyl radical ( $\text{HO}^\cdot$ ) reaction rate constants, *Environ. Sci. Tech.*, 43, 6220-6227, 10.1021/es900956c, 2009.

Monod, A., Chevallier, E., Durand Jolibois, R., Doussin, J. F., Picquet-Varrault, B., and Carlier, P.: Photooxidation of methylhydroperoxide and ethylhydroperoxide in the aqueous phase under simulated cloud droplet conditions, *Atmos. Environ.*, 41, 2412-2426, 2007.

Neta, P., Huie, R., and Ross, A.: Rate constants for reactions of peroxyl radicals in fluid solutions, *J. Phys. Chem. Ref. Data*, 19, 413, 1990.

Piesiak, A., Schuchmann, M. N., Zegota, H., and von Sonntag, C.:  $\beta$ -Hydroxyethylperoxyl radicals: A study of the  $\gamma$ -radiolysis and pulse radiolysis of ethylene in oxygenated aqueous solutions, *Z. Naturforsch.*, 39b, 1262-1267, 1984.

Schuchmann, M. N., Zegota, H., and Von Sonntag, C.: Acetate peroxyl radicals  $\text{O}_2\text{CH}_2\text{CO}_2^\cdot$ : A study on the  $\gamma$ -radiolysis and pulse radiolysis of acetate in oxygenated aqueous solutions, *Z. Naturforsch.*, 40b, 215-221, 1985.

Von Sonntag, C.: The chemical basis of radiation biology, Taylor & Francis, 1987.

Zegota, H., Schuchmann, M. N., and Von Sonntag, C.: Elucidation of the mechanism of peroxyl radical reactions in aqueous solutions using the pulse radiolysis technique, *J. Radioanal. Nucl. Chem.*, 101, 199-207, 1986.
