# Supplementary material for: Modeling the partitioning of organic chemical species in cloud phases with CLEPS (1.1)
Source: Copernicus journal article supplement (doi:10.5194/acp-18-2225-2018), 2018-02-15
Supplement: Supplementary file 2 [file acp-18-2225-2018-supplement.zip]

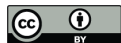

*Supplement of*

## **Modeling the partitioning of organic chemical species in cloud phases with CLEPS (1.1)**

**Clémence Rose et al.**

*Correspondence to:* Laurent Deguillaume ([l.deguillaume@opgc.univ-bpclermont.fr](mailto:l.deguillaume@opgc.univ-bpclermont.fr))  
and Nadine Chaumerliac ([n.chaumerliac@opgc.univ-bpclermont.fr](mailto:n.chaumerliac@opgc.univ-bpclermont.fr))

- [acp-18-2225-2018-supplement-title-page.pdf](#)
- [Supplementary-information.pdf](#)
- [TableC4-equi-Henry-alpha.pdf](#)
- [TableC4-oxidation.pdf](#)

The copyright of individual parts of the supplement might differ from the CC BY 4.0 License.
