# Supplementary material for: Modeling the partitioning of organic chemical species in cloud phases with CLEPS (1.1)
Source: Copernicus journal article supplement (doi:10.5194/acp-18-2225-2018), 2018-02-15
Supplement: Supplementary file 4 [file acp-18-2225-2018-supplement.zip]

## Equilibria

| Species                                                                                                                                                     |       | K <sub>a</sub> or K <sub>h</sub> | -ΔH/R<br>(K) | References               | Notes                                                                                                                                                     |
|-------------------------------------------------------------------------------------------------------------------------------------------------------------|-------|----------------------------------|--------------|--------------------------|-----------------------------------------------------------------------------------------------------------------------------------------------------------|
| <b>C4 compounds</b>                                                                                                                                         |       |                                  |              |                          |                                                                                                                                                           |
| <b>Succinic acid</b>                                                                                                                                        |       |                                  |              |                          |                                                                                                                                                           |
| CO(OH)CH <sub>2</sub> CH <sub>2</sub> CO(OH) ↔ CO(OH)CH <sub>2</sub> CH <sub>2</sub> CO(O <sup>-</sup> ) + H <sup>+</sup>                                   | T(1)  | 6.2 10 <sup>-5</sup>             |              | Hayne, 2015              |                                                                                                                                                           |
| CO(OH)CH <sub>2</sub> CH <sub>2</sub> CO(O <sup>-</sup> ) ↔ CO(O <sup>-</sup> )CH <sub>2</sub> CH <sub>2</sub> CO(O <sup>-</sup> ) + H <sup>+</sup>         | T(2)  | 2.3 10 <sup>-6</sup>             |              | Hayne, 2015              |                                                                                                                                                           |
| CO(OH)CH <sub>2</sub> CH(OO <sup>•</sup> )CO(OH) ↔ CO(OH)CH <sub>2</sub> CH(OO <sup>•</sup> )CO(O <sup>-</sup> ) + H <sup>+</sup>                           | T(3)  | 6.2 10 <sup>-5</sup>             |              |                          | 1<br>= K <sub>a</sub> (CO(OH)CH <sub>2</sub> CH <sub>2</sub> CO(OH)/ CO(OH)CH <sub>2</sub> CH <sub>2</sub> CO(O <sup>-</sup> ))                           |
| CO(OH)CH <sub>2</sub> CH(OO <sup>•</sup> )CO(OH) ↔ CO(O <sup>-</sup> )CH <sub>2</sub> CH(OO <sup>•</sup> )CO(OH) + H <sup>+</sup>                           | T(4)  | 6.2 10 <sup>-5</sup>             |              |                          | 1<br>= K <sub>a</sub> (CO(OH)CH <sub>2</sub> CH <sub>2</sub> CO(OH)/ CO(OH)CH <sub>2</sub> CH <sub>2</sub> CO(O <sup>-</sup> ))                           |
| CO(OH)CH <sub>2</sub> CH(OO <sup>•</sup> )CO(O <sup>-</sup> ) ↔ CO(O <sup>-</sup> )CH <sub>2</sub> CH(OO <sup>•</sup> )CO(O <sup>-</sup> ) + H <sup>+</sup> | T(5)  | 2.3 10 <sup>-6</sup>             |              |                          | 1<br>= K <sub>a</sub> (CO(OH)CH <sub>2</sub> CH <sub>2</sub> CO(O <sup>-</sup> )/ CO(O <sup>-</sup> )CH <sub>2</sub> CH <sub>2</sub> CO(O <sup>-</sup> )) |
| <b>Oxaloacetic acid</b>                                                                                                                                     |       |                                  |              |                          |                                                                                                                                                           |
| CO(OH)CH <sub>2</sub> COCO(OH) ↔ CO(OH)CH <sub>2</sub> COCO(O <sup>-</sup> ) + H <sup>+</sup>                                                               | T(6)  | 2.8 10 <sup>-3</sup>             |              | Hayne, 2015              | 2                                                                                                                                                         |
| CO(OH)CH <sub>2</sub> COCO(OH) ↔ CO(O <sup>-</sup> )CH <sub>2</sub> COCO(OH) + H <sup>+</sup>                                                               | T(7)  | 2.8 10 <sup>-3</sup>             |              | Hayne, 2015              | 2                                                                                                                                                         |
| CO(OH)CH <sub>2</sub> COCO(O <sup>-</sup> ) ↔ CO(O <sup>-</sup> )CH <sub>2</sub> COCO(O <sup>-</sup> ) + H <sup>+</sup>                                     | T(8)  | 4.3 10 <sup>-5</sup>             |              | Hayne, 2015              |                                                                                                                                                           |
| CO(OH)CH <sub>2</sub> COCO(OH) + H <sub>2</sub> O ↔ CO(OH)CH <sub>2</sub> C(OH)(OH)CO(OH)                                                                   | T(9)  | 1.8 10 <sup>1</sup>              |              | Estimated<br>with GROMHE |                                                                                                                                                           |
| CO(OH)CH <sub>2</sub> COCO(O <sup>-</sup> ) + H <sub>2</sub> O ↔ CO(OH)CH <sub>2</sub> C(OH)(OH)CO(O <sup>-</sup> )                                         | T(10) | 1.2 10 <sup>-1</sup>             |              | Estimated<br>with GROMHE |                                                                                                                                                           |
| CO(O <sup>-</sup> )CH <sub>2</sub> COCO(OH) + H <sub>2</sub> O ↔ CO(O <sup>-</sup> )CH <sub>2</sub> C(OH)(OH)CO(OH)                                         | T(11) | 2.4 10 <sup>0</sup>              |              | Estimated<br>with GROMHE |                                                                                                                                                           |
| CO(O <sup>-</sup> )CH <sub>2</sub> COCO(O <sup>-</sup> ) + H <sub>2</sub> O ↔ CO(O <sup>-</sup> )CH <sub>2</sub> C(OH)(OH)CO(O <sup>-</sup> )               | T(12) | 2.0 10 <sup>-2</sup>             |              | Estimated<br>with GROMHE |                                                                                                                                                           |
| CO(OH)CH(OO <sup>•</sup> )COCO(OH) ↔ CO(OH)CH(OO <sup>•</sup> )COCO(O <sup>-</sup> ) + H <sup>+</sup>                                                       | T(13) | 2.8 10 <sup>-3</sup>             |              |                          | 1<br>= K <sub>a</sub> (CO(OH)CH <sub>2</sub> COCO(OH)/ CO(OH)CH <sub>2</sub> COCO(O <sup>-</sup> ))                                                       |
| CO(OH)CH(OO <sup>•</sup> )COCO(OH) ↔ CO(O <sup>-</sup> )CH(OO <sup>•</sup> )COCO(OH) + H <sup>+</sup>                                                       | T(14) | 2.8 10 <sup>-3</sup>             |              |                          | 1<br>= K <sub>a</sub> (CO(OH)CH <sub>2</sub> COCO(OH)/ CO(O <sup>-</sup> )CH <sub>2</sub> COCO(OH))                                                       |
| CO(OH)CH(OO <sup>•</sup> )COCO(O <sup>-</sup> ) ↔ CO(O <sup>-</sup> )CH(OO <sup>•</sup> )COCO(O <sup>-</sup> ) + H <sup>+</sup>                             | T(15) | 4.3 10 <sup>-5</sup>             |              |                          | 1<br>= K <sub>a</sub> (CO(OH)CH <sub>2</sub> COCO(O <sup>-</sup> )/ CO(O <sup>-</sup> )CH <sub>2</sub> COCO(O <sup>-</sup> ))                             |
| CO(OH)CH(OO <sup>•</sup> )COCO(OH) + H <sub>2</sub> O ↔ CO(OH)CH(OO <sup>•</sup> )C(OH)(OH)CO(OH)                                                           | T(16) | 1.8 10 <sup>1</sup>              |              |                          | 3<br>= K <sub>h</sub> (CO(OH)CH <sub>2</sub> COCO(OH)/ CO(OH)CH <sub>2</sub> C(OH)(OH)CO(OH))                                                             |
| CO(OH)CH(OO <sup>•</sup> )COCO(O <sup>-</sup> ) + H <sub>2</sub> O ↔ CO(OH)CH(OO <sup>•</sup> )C(OH)(OH)CO(O <sup>-</sup> )                                 | T(17) | 1.2 10 <sup>-1</sup>             |              |                          | 3<br>= K <sub>h</sub> (CO(OH)CH <sub>2</sub> COCO(O <sup>-</sup> )/ CO(OH)CH <sub>2</sub> C(OH)(OH)CO(O <sup>-</sup> ))                                   |
| CO(O <sup>-</sup> )CH(OO <sup>•</sup> )COCO(OH) + H <sub>2</sub> O ↔ CO(O <sup>-</sup> )CH(OO <sup>•</sup> )C(OH)(OH)CO(OH)                                 | T(18) | 2.4 10 <sup>0</sup>              |              |                          | 3<br>= K <sub>h</sub> (CO(O <sup>-</sup> )CH <sub>2</sub> COCO(OH)/ CO(O <sup>-</sup> )CH <sub>2</sub> C(OH)(OH)CO(OH))                                   |
| CO(O <sup>-</sup> )CH(OO <sup>•</sup> )COCO(O <sup>-</sup> ) + H <sub>2</sub> O ↔ CO(O <sup>-</sup> )CH(OO <sup>•</sup> )C(OH)(OH)CO(O <sup>-</sup> )       | T(19) | 2.0 10 <sup>-2</sup>             |              |                          | 3<br>= K <sub>h</sub> (CO(O <sup>-</sup> )CH <sub>2</sub> COCO(O <sup>-</sup> )/ CO(O <sup>-</sup> )CH <sub>2</sub> C(OH)(OH)CO(O <sup>-</sup> ))         |
| <b>Malic acid</b>                                                                                                                                           |       |                                  |              |                          |                                                                                                                                                           |
| CO(OH)CH <sub>2</sub> CH(OH)CO(OH) ↔ CO(OH)CH <sub>2</sub> CH(OH)CO(O <sup>-</sup> ) + H <sup>+</sup>                                                       | T(20) | 4.0 10 <sup>-4</sup>             |              | Hayne, 2015              | 2                                                                                                                                                         |

| Species                                                                                                                                                           |       | K <sub>a</sub> or K <sub>h</sub> | -ΔH/R<br>(K) | References  | Notes                                                                                                                                 |
|-------------------------------------------------------------------------------------------------------------------------------------------------------------------|-------|----------------------------------|--------------|-------------|---------------------------------------------------------------------------------------------------------------------------------------|
| CO(OH)CH <sub>2</sub> CH(OH)CO(OH) ↔ CO(O <sup>-</sup> )CH <sub>2</sub> CH(OH)CO(OH) + H <sup>+</sup>                                                             | T(21) | 4.0 10 <sup>-4</sup>             |              | Hayne, 2015 | 2                                                                                                                                     |
| CO(OH)CH <sub>2</sub> CH(OH)CO(O <sup>-</sup> ) ↔ CO(O <sup>-</sup> )CH <sub>2</sub> CH(OH)CO(O <sup>-</sup> ) + H <sup>+</sup>                                   | T(22) | 7.8 10 <sup>-6</sup>             |              | Hayne, 2015 |                                                                                                                                       |
| CO(OH)CH <sub>2</sub> C(OH)(OO <sup>•</sup> )CO(OH) ↔ CO(OH)CH <sub>2</sub> C(OH)(OO <sup>•</sup> )CO(O <sup>-</sup> ) + H <sup>+</sup>                           | T(23) | 4.0 10 <sup>-4</sup>             |              |             | 1<br>= K <sub>a</sub> (CO(OH)CH <sub>2</sub> CH(OH)CO(OH)/ CO(OH)CH <sub>2</sub> CH(OH)CO(O <sup>-</sup> ))                           |
| CO(OH)CH <sub>2</sub> C(OH)(OO <sup>•</sup> )CO(OH) ↔ CO(O <sup>-</sup> )CH <sub>2</sub> C(OH)(OO <sup>•</sup> )CO(OH) + H <sup>+</sup>                           | T(24) | 4.0 10 <sup>-4</sup>             |              |             | 1<br>= K <sub>a</sub> (CO(OH)CH <sub>2</sub> CH(OH)CO(OH)/ CO(O <sup>-</sup> )CH <sub>2</sub> CH(OH)CO(OH))                           |
| CO(OH)CH <sub>2</sub> C(OH)(OO <sup>•</sup> )CO(O <sup>-</sup> ) ↔ CO(O <sup>-</sup> )CH <sub>2</sub> C(OH)(OO <sup>•</sup> )CO(O <sup>-</sup> ) + H <sup>+</sup> | T(25) | 7.8 10 <sup>-6</sup>             |              |             | 1<br>= K <sub>a</sub> (CO(OH)CH <sub>2</sub> CH(OH)CO(O <sup>-</sup> )/ CO(O <sup>-</sup> )CH <sub>2</sub> CH(OH)CO(O <sup>-</sup> )) |
| <b>Tartric acid</b>                                                                                                                                               |       |                                  |              |             |                                                                                                                                       |
| CO(OH)CH(OH)CH(OH)CO(OH) ↔ CO(OH)CH(OH)CH(OH)CO(O <sup>-</sup> ) + H <sup>+</sup>                                                                                 | T(26) | 9.3 10 <sup>-4</sup>             |              | Hayne, 2015 |                                                                                                                                       |
| CO(OH)CH(OH)CH(OH)CO(O <sup>-</sup> ) ↔ CO(O <sup>-</sup> )CH(OH)CH(OH)CO(O <sup>-</sup> ) + H <sup>+</sup>                                                       | T(27) | 4.3 10 <sup>-5</sup>             |              | Hayne, 2015 |                                                                                                                                       |
| CO(OH)C(OH)(OO <sup>•</sup> )CH(OH)CO(OH) ↔ CO(OH)CH(OH)C(OH)(OO <sup>•</sup> )CO(O <sup>-</sup> ) + H <sup>+</sup>                                               | T(28) | 9.3 10 <sup>-4</sup>             |              |             | 1<br>= K <sub>a</sub> (CO(OH)CH(OH)CH(OH)CO(OH)/ CO(OH)CH(OH)CH(OH)CO(O <sup>-</sup> ))                                               |
| CO(OH)C(OH)(OO <sup>•</sup> )CH(OH)CO(OH) ↔ CO(O <sup>-</sup> )CH(OH)C(OH)(OO <sup>•</sup> )CO(OH) + H <sup>+</sup>                                               | T(29) | 9.3 10 <sup>-4</sup>             |              |             | 1<br>= K <sub>a</sub> (CO(OH)CH(OH)CH(OH)CO(OH)/ CO(OH)CH(OH)CH(OH)CO(O <sup>-</sup> ))                                               |
| CO(OH)CH(OH)C(OH)(OO <sup>•</sup> )CO(O <sup>-</sup> ) ↔ CO(O <sup>-</sup> )CH(OH)C(OH)(OO <sup>•</sup> )CO(O <sup>-</sup> ) + H <sup>+</sup>                     | T(30) | 4.3 10 <sup>-5</sup>             |              |             | 1<br>= K <sub>a</sub> (CO(OH)CH(OH)CH(OH)CO(O <sup>-</sup> )/ CO(O <sup>-</sup> )CH(OH)CH(OH)CO(O <sup>-</sup> ))                     |
| <b>Fumaric acid</b>                                                                                                                                               |       |                                  |              |             |                                                                                                                                       |
| CO(OH)CH=CHCO(OH) ↔ CO(OH)CH=CHCO(O <sup>-</sup> ) + H <sup>+</sup>                                                                                               | T(31) | 9.5 10 <sup>-4</sup>             |              | Hayne, 2015 |                                                                                                                                       |
| CO(OH)CH=CHCO(O <sup>-</sup> ) ↔ CO(O <sup>-</sup> )CH=CHCO(O <sup>-</sup> ) + H <sup>+</sup>                                                                     | T(32) | 4.2 10 <sup>-5</sup>             |              | Hayne, 2015 |                                                                                                                                       |
| CO(OH)CH(OH)CH(OO <sup>•</sup> )CO(OH) ↔ CO(O <sup>-</sup> )CH(OH)CH(OO <sup>•</sup> )CO(OH)                                                                      | T(33) | 9.5 10 <sup>-4</sup>             |              |             | 1<br>= K <sub>a</sub> (CO(OH)CH=CHCO(OH)/ CO(OH)CH=CHCO(O <sup>-</sup> ))                                                             |
| CO(OH)CH(OH)CH(OO <sup>•</sup> )CO(OH) ↔ CO(O <sup>-</sup> )CH(OO <sup>•</sup> )CH(OH)CO(OH)                                                                      | T(34) | 9.5 10 <sup>-4</sup>             |              |             | 1<br>= K <sub>a</sub> (CO(OH)CH=CHCO(OH)/ CO(OH)CH=CHCO(O <sup>-</sup> ))                                                             |
| CO(O <sup>-</sup> )CH(OH)CH(OO <sup>•</sup> )CO(OH) ↔ CO(O <sup>-</sup> )CH(OH)CH(OO <sup>•</sup> )CO(O <sup>-</sup> )                                            | T(35) | 4.2 10 <sup>-5</sup>             |              |             | 1<br>= K <sub>a</sub> (CO(O <sup>-</sup> )CH=CHCO(O <sup>-</sup> )/ CO(O <sup>-</sup> )CH=CHCO(O <sup>-</sup> ))                      |
| <b>Maleic acid</b>                                                                                                                                                |       |                                  |              |             |                                                                                                                                       |
| CO(OH)CH=CHCO(OH) ↔ CO(OH)CH=CHCO(O <sup>-</sup> ) + H <sup>+</sup>                                                                                               | T(36) | 1.2 10 <sup>-2</sup>             |              | Hayne, 2015 |                                                                                                                                       |
| CO(OH)CH=CHCO(O <sup>-</sup> ) ↔ CO(O <sup>-</sup> )CH=CHCO(O <sup>-</sup> ) + H <sup>+</sup>                                                                     | T(37) | 5.9 10 <sup>-7</sup>             |              | Hayne, 2015 |                                                                                                                                       |

- 
- 1 - For peroxy radicals, we assumed that the acidity constant is similar to the parent species.  
2 - We suppose that the two monoanions present similar K<sub>a</sub>.  
3 - For peroxy radicals, we assumed that the hydration constant is similar to the parent species.

#### References:

---

Hayne, W. M.: CRC Handbook of Chemistry and Physics, Boca Raton, FL, CRC Press, 96e ed., 2677 p., 2015.

## Henry's law constants

| Species                                                              |      | H (298K)<br>(M atm <sup>-1</sup> ) | -ΔH/R<br>(K) | References | Notes     |
|----------------------------------------------------------------------|------|------------------------------------|--------------|------------|-----------|
| <b>C4 compounds</b>                                                  |      |                                    |              |            |           |
| <b>Succinic acid</b><br>CO(OH)CH <sub>2</sub> CH <sub>2</sub> CO(OH) | T(1) | 5.2 10 <sup>8</sup>                | 6014         | Estimated  | 1 - 2     |
| <b>Oxaloacetic acid</b><br>CO(OH)CH <sub>2</sub> COCO(OH)            | T(2) | 5.8 10 <sup>8</sup>                | 6014         | Estimated  | 1 - 2 - 3 |
| <b>Malic acid</b><br>CO(OH)CH <sub>2</sub> CH(OH)CO(OH)              | T(3) | 4.5 10 <sup>8</sup>                | 6014         | Estimated  | 1 - 2     |
| <b>Tartric acid</b><br>CO(OH)CH(OH)CH(OH)CO(OH)                      | T(4) | 2.7 10 <sup>9</sup>                | 6014         | Estimated  | 1 - 2     |
| <b>Fumaric/maleic acid</b><br>CO(OH)CH(OH)CH(OH)CO(OH)               | T(5) | 4.7 10 <sup>7</sup>                | 6014         | Estimated  | 1 - 2     |

1 - Estimated by the SAR GROMHE (Raventos-Duran et al., 2010).

2 - When unavailable, the temperature dependence (enthalpy of dissolution) is set at 50 kJ mol<sup>-1</sup>; -ΔH/R = 6014 K.

3 - Effective Henry's law constant.

### References:

Raventos-Duran, T., Camredon, M., Valorso, R., Mouchel-Vallon, C., and Aumont, B.: Structure-activity relationships to estimate the effective Henry's law constants of organics of atmospheric interest, Atmos. Chem. Phys., 10, 7643-7654, 2010.

## Accommodation coefficients

| Species                                                              | $\alpha$<br>(298K)   | $-\Delta H$<br>(J/mol) | $-\Delta S$<br>(J/mol/K) | References | Notes |
|----------------------------------------------------------------------|----------------------|------------------------|--------------------------|------------|-------|
| <b>C4 compounds</b>                                                  | 1                    |                        |                          |            |       |
| <b>Succinic acid</b><br>CO(OH)CH <sub>2</sub> CH <sub>2</sub> CO(OH) | 5.0 10 <sup>-2</sup> |                        |                          | Estimated  | 2     |
| <b>Oxaloacetic acid</b><br>CO(OH)CH <sub>2</sub> COCO(OH)            | 5.0 10 <sup>-2</sup> |                        |                          | Estimated  | 2     |
| <b>Malic acid</b><br>CO(OH)CH <sub>2</sub> CH(OH)CO(OH)              | 5.0 10 <sup>-2</sup> |                        |                          | Estimated  | 2     |
| <b>Tartric acid</b><br>CO(OH)CH(OH)CH(OH)CO(OH)                      | 5.0 10 <sup>-2</sup> |                        |                          | Estimated  | 2     |
| <b>Fumaric/maleic acid</b><br>CO(OH)CH(OH)CH(OH)CO(OH)               | 5.0 10 <sup>-2</sup> |                        |                          | Estimated  | 2     |

1 -  $\alpha$  can be calculated with  $\Delta H$  and  $\Delta S$ ; this allows considering the temperature dependency of  $\alpha$  following Jayne et al. (1991):  $\frac{\alpha}{1-\alpha} = \exp\left(\frac{-\Delta G}{RT}\right)$ ;  $\Delta G = \Delta H - T\Delta S$

2 - Estimated equal 5.0 10<sup>-2</sup> following Lelieveld and Crutzen (1991) and Davidovits et al. (2011).

### References:

Davidovits, P., Kolb, C. E., Williams, L. R., Jayne, J. T., and Worsnop, D. R.: Update 1 of: Mass accommodation and chemical reactions at gas–liquid interfaces, Chem. Rev., 111, 2011.  
 Jayne, J. T., Duan, S. X., Davidovits, P., Worsnop, D. R., Zahniser, M. S., and Kolb, C. E. Uptake of gas-phase alcohol and organic acid molecules by water surfaces, J. Phys. Chem., 95, 6329, 1991.  
 Lelieveld, J., and Crutzen, P. J.: The role of clouds in tropospheric photochemistry, J. Atmos. Chem., 12, 229-267, 1991.
